# Supplementary material for: A penalized regression approach for DNA copy number study using the sequencing data
Source: publisher site journal article supplement (doi:10.1515/sagmb-2018-0001), 2019-05-30
Supplement: Supplementary file 1 [file Jaeeun_JC_SAGMB_supplemental_figures_revision.pdf › Jaeeun_JC_SAGMB_supplemental_figures_revision.pdf]

Supplemental Figures: Results on other 19 chromosomes from HCC1954

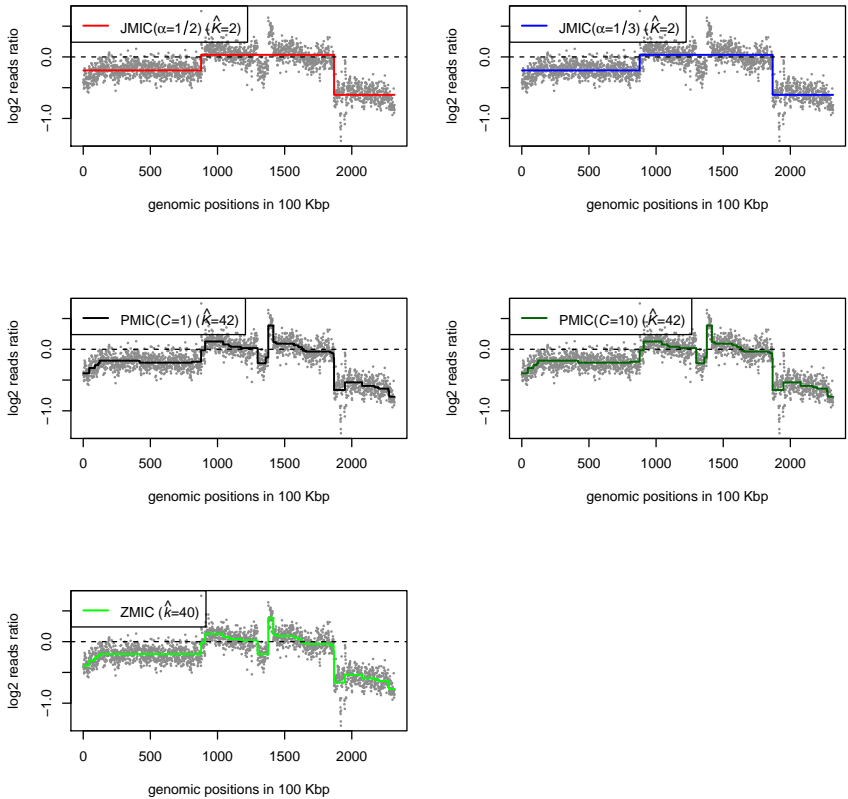

**Supplemental Fig. 1:** Chromosome 2 with the identified change points by the 1d fused LASSO models based on JM1C( $\alpha = 1/2, 1/3$ ), PM1C( $C = 1, 10$ ), ZM1C.  $\hat{K}$  denotes the estimated number of change points. The solid line represents the average reads ratio in each segment. The dashed line is for  $\hat{y} = 0$ , indicating no copy number change. For chromosome 2, the estimated number ( or  $\hat{K} + 1$ ) of CNV segments is 3.

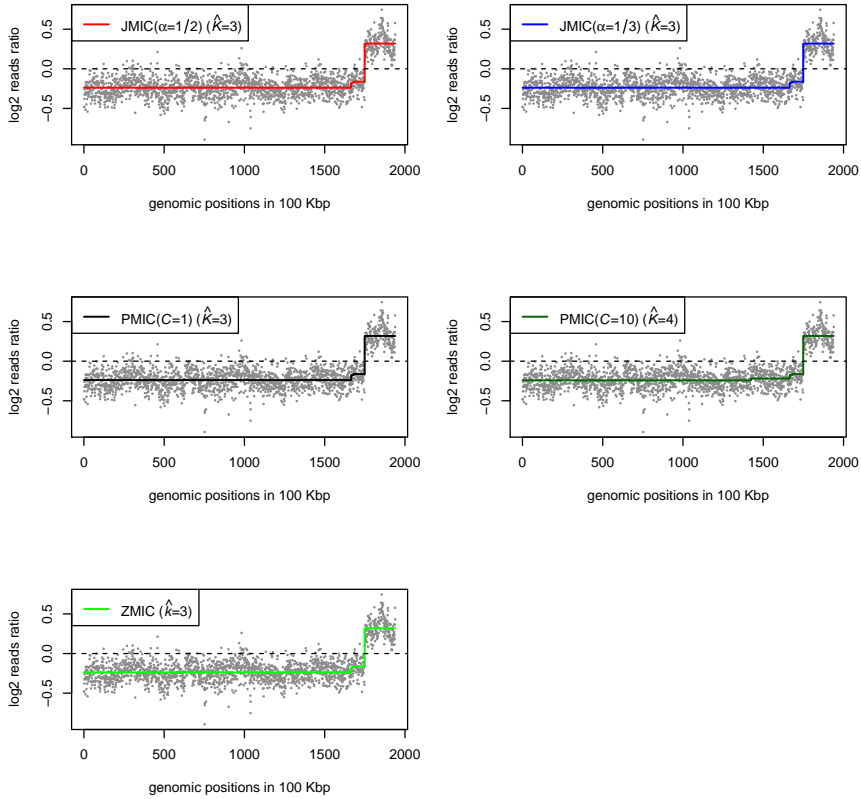

**Supplemental Fig. 2:** Chromosome 3 with the identified change points by the 1d fused LASSO models based on JMIC( $\alpha = 1/2, 1/3$ ), PMIC( $C = 1, 10$ ), ZMIC.  $\hat{K}$  denotes the estimated number of change points. The solid line represents the average reads ratio in each segment. The dashed line is for  $\hat{y} = 0$ , indicating no copy number change. For chromosome 3, the estimated number (or  $\hat{K} + 1$ ) of CNV segments is 4.

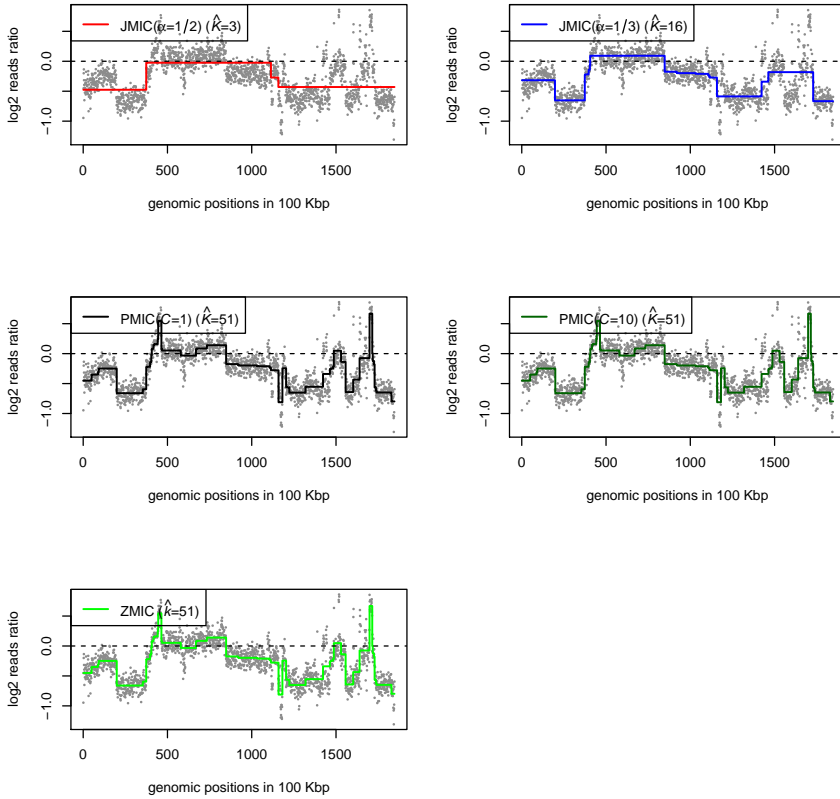

**Supplemental Fig. 3:** Chromosome 4 with the identified change points by the 1d fused LASSO models based on JMIC( $\alpha = 1/2, 1/3$ ), PMIC( $C = 1, 10$ ), ZMIC.  $\hat{K}$  denotes the estimated number of change points. The solid line represents the average reads ratio in each segment. The dashed line is for  $\hat{y} = 0$ , indicating no copy number change. For chromosome 4, the estimated number (or  $\hat{K} + 1$ ) of CNV segments is 17.

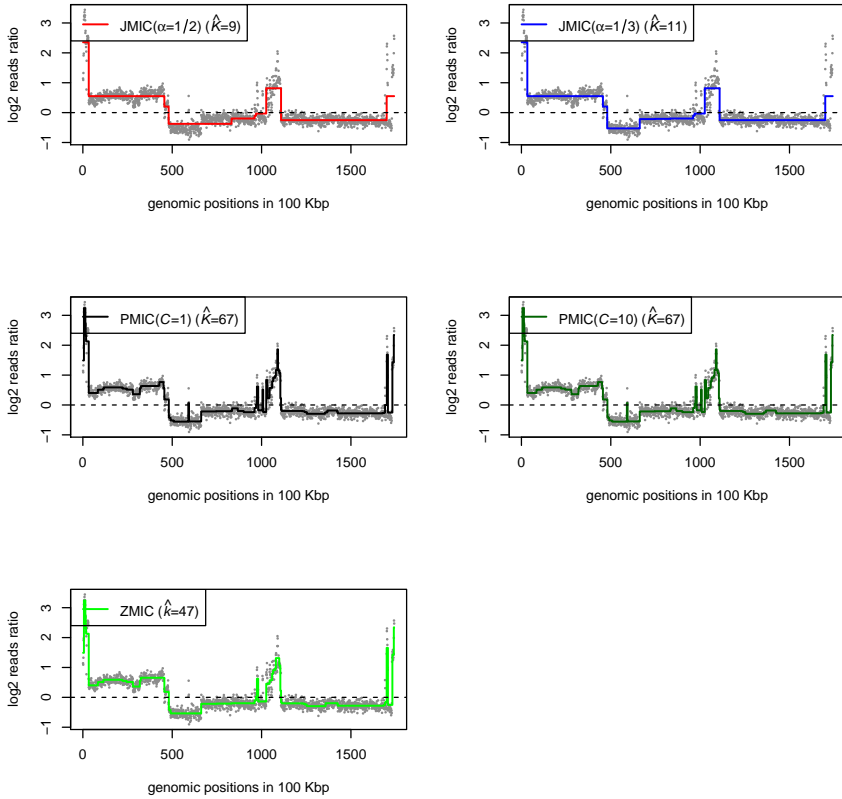

**Supplemental Fig. 4:** Chromosome 5 with the identified change points by the 1d fused LASSO models based on  $\text{JMIC}(\alpha = 1/2, 1/3)$ ,  $\text{PMIC}(C = 1, 10)$ ,  $\text{ZMIC}$ .  $\hat{K}$  denotes the estimated number of change points. The solid line represents the average reads ratio in each segment. The dashed line is for  $\hat{y} = 0$ , indicating no copy number change. For chromosome 5, the estimated number (or  $\hat{K} + 1$ ) of CNV segments is 10.

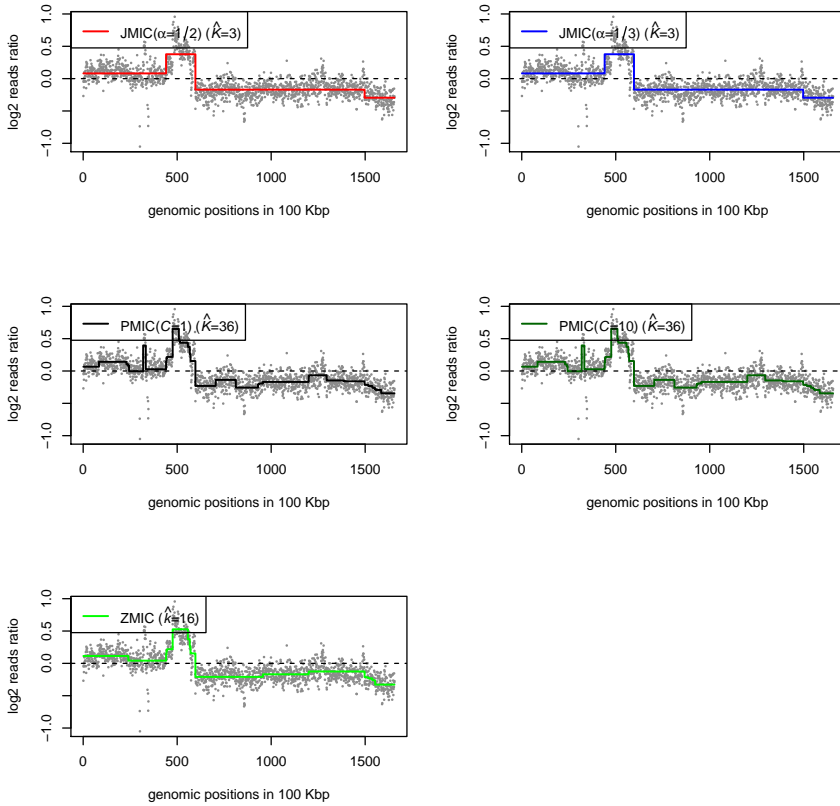

**Supplemental Fig. 5:** Chromosome 6 with the identified change points by the 1d fused LASSO models based on JMIC( $\alpha = 1/2, 1/3$ ), PMIC( $C = 1, 10$ ), ZMIC.  $\hat{K}$  denotes the estimated number of change points. The solid line represents the average reads ratio in each segment. The dashed line is for  $\hat{y} = 0$ , indicating no copy number change. For chromosome 6, the estimated number (or  $\hat{K} + 1$ ) of CNV segments is 4.

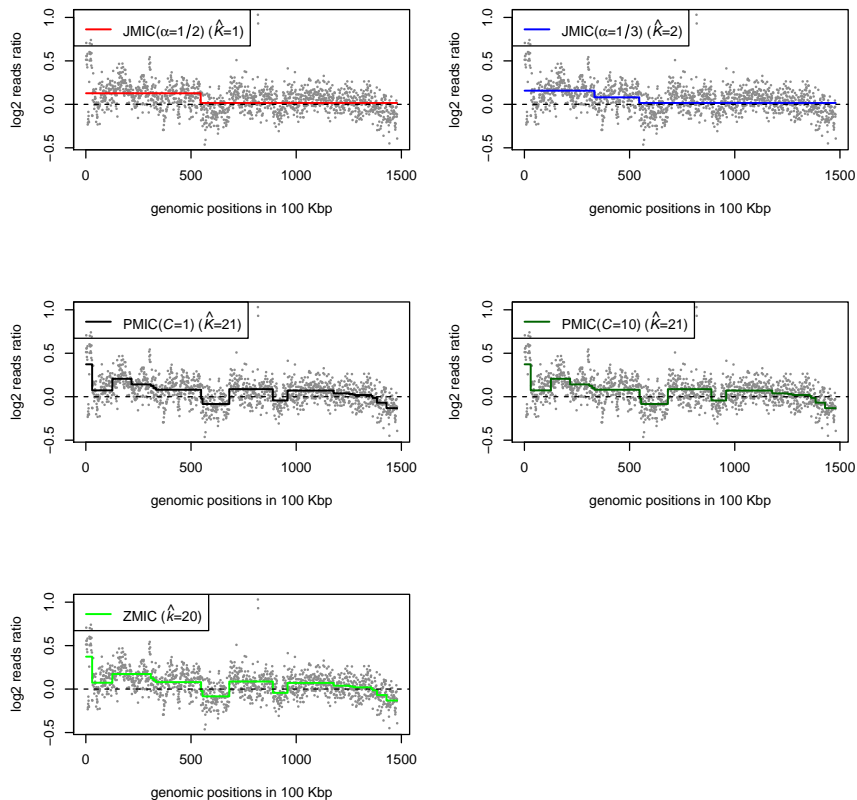

**Supplemental Fig. 6:** Chromosome 7 with the identified change points by the 1d fused LASSO models based on JMIC( $\alpha = 1/2, 1/3$ ), PMIC( $C = 1, 10$ ), ZMIC.  $\hat{K}$  denotes the estimated number of change points. The solid line represents the average reads ratio in each segment. The dashed line is for  $\hat{y} = 0$ , indicating no copy number change. For chromosome 7, the estimated number (or  $\hat{K} + 1$ ) of CNV segments is 3.

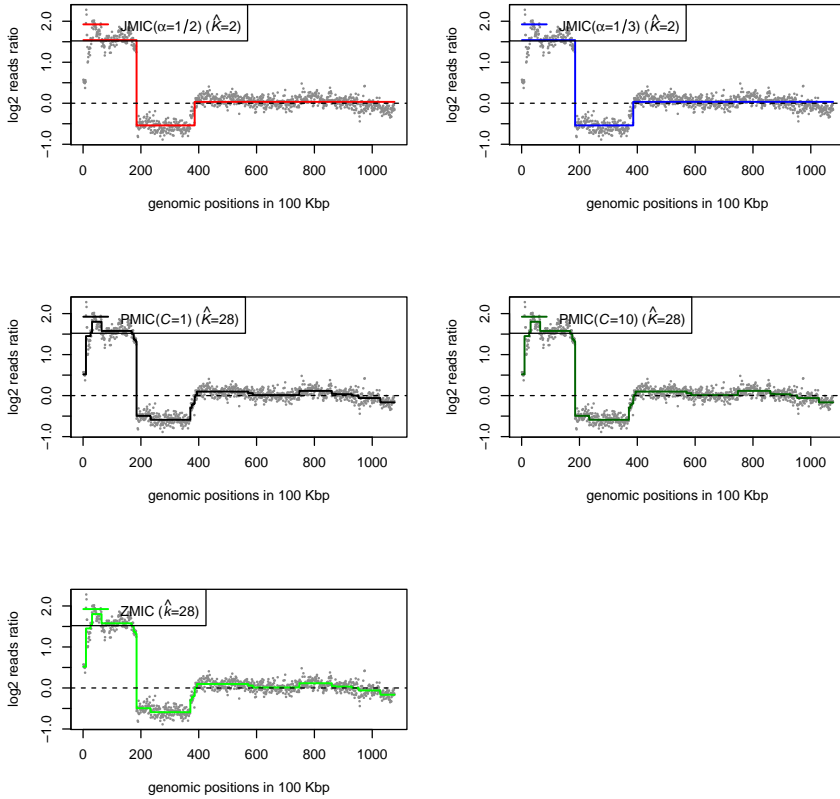

**Supplemental Fig. 7:** Chromosome 9 with the identified change points by the 1d fused LASSO models based on  $\text{JMIC}(\alpha = 1/2, 1/3)$ ,  $\text{PMIC}(C = 1, 10)$ , and  $\text{ZMIC}$ .  $\hat{K}$  denotes the estimated number of change points. The solid line represents the average reads ratio in each segment. The dashed line is for  $\hat{y} = 0$ , indicating no copy number change. For chromosome 9, the estimated number (or  $\hat{K} + 1$ ) of CNV segments is 3.

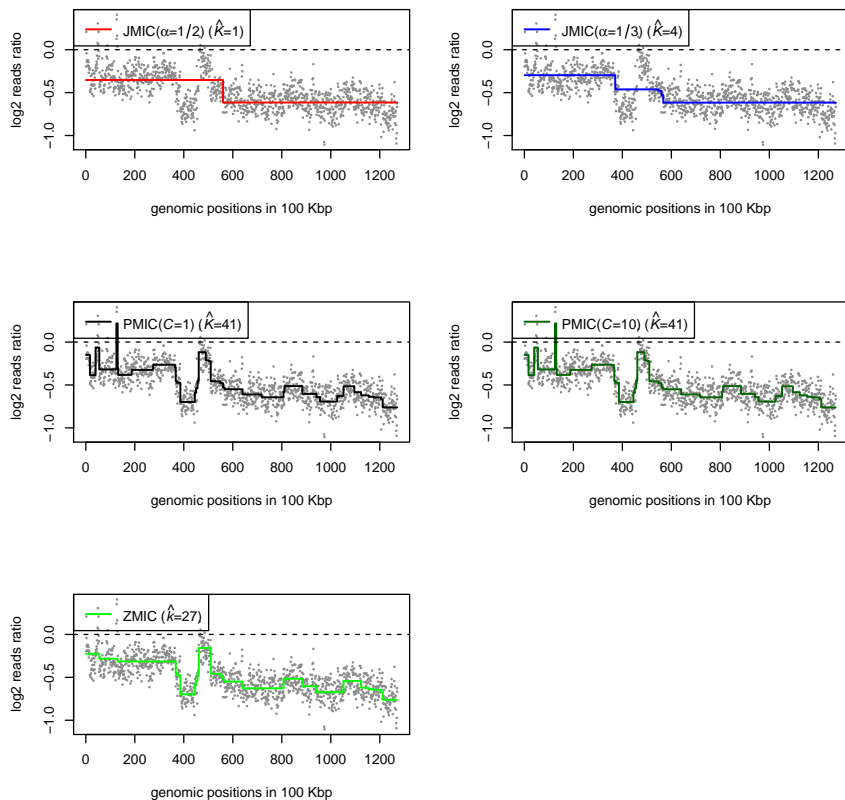

**Supplemental Fig. 8:** Chromosome 10 with the identified change points by the 1d fused LASSO models based on  $\text{JMIC}(\alpha = 1/2, 1/3)$ ,  $\text{PMIC}(C = 1, 10)$ , and  $\text{ZMIC}$ .  $\hat{K}$  denotes the estimated number of change points. The solid line represents the average reads ratio in each segment. The dashed line is for  $\hat{y} = 0$ , indicating no copy number change. For chromosome 10, the estimated number (or  $\hat{K} + 1$ ) of CNV segments is 5.



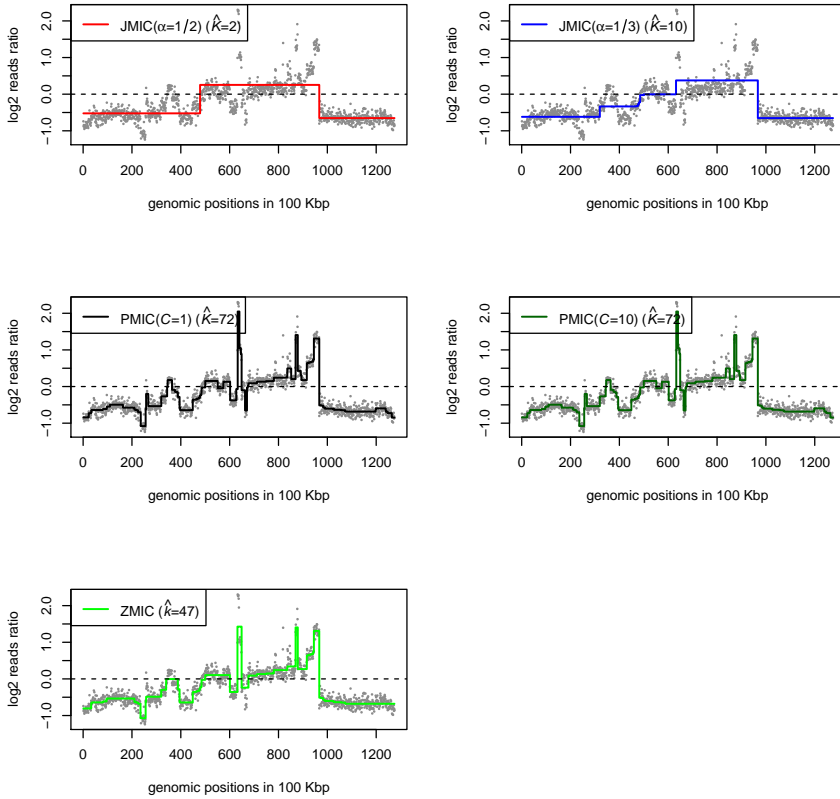

**Supplemental Fig. 9:** Chromosome 11 with the identified change points by the 1d fused LASSO models based on JMIC( $\alpha = 1/2, 1/3$ ), PMIC( $C = 1, 10$ ), and ZMIC.  $\hat{K}$  denotes the estimated number of change points. The solid line represents the average reads ratio in each segment. The dashed line is for  $\hat{y} = 0$ , indicating no copy number change. For chromosome 11, the estimated number (or  $\hat{K} + 1$ ) of CNV segments is 11.

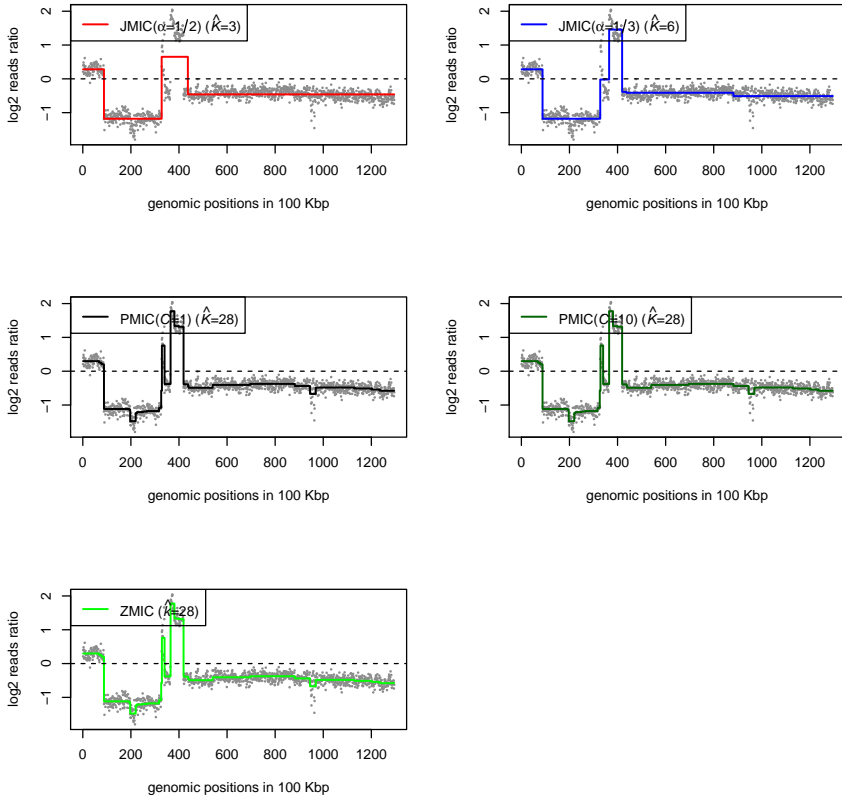

**Supplemental Fig. 10:** Chromosome 12 with the identified change points by the 1d fused LASSO models based on JMIC( $\alpha = 1/2, 1/3$ ), PMIC( $C = 1, 10$ ), and ZMIC.  $\hat{K}$  denotes the estimated number of change points. The solid line represents the average reads ratio in each segment. The dashed line is for  $\hat{y} = 0$ , indicating no copy number change. For chromosome 12, the estimated number (or  $\hat{K} + 1$ ) of CNV segments is 7.

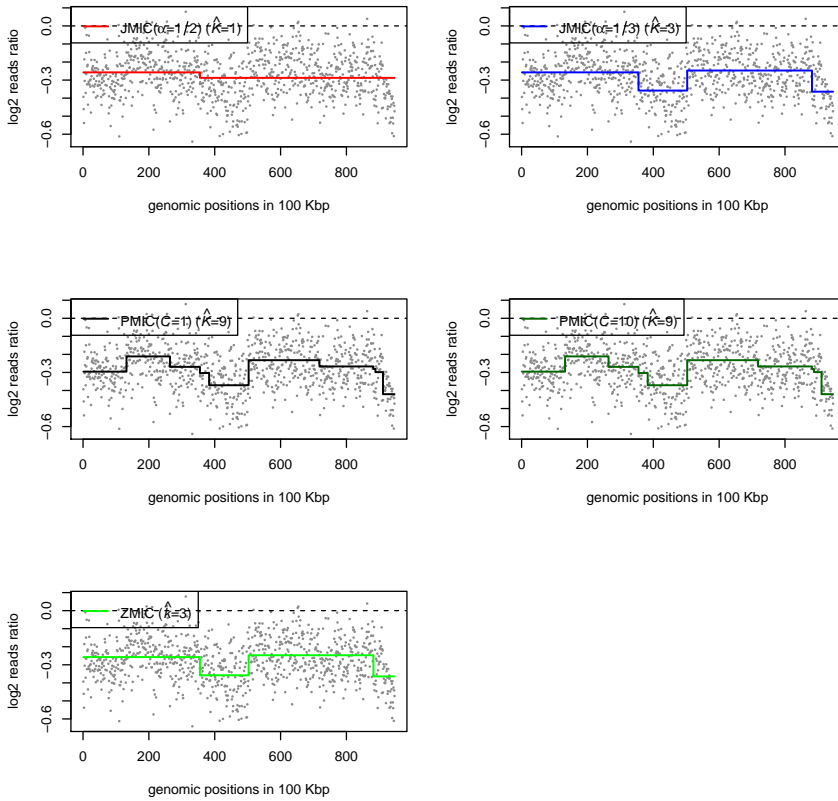

**Supplemental Fig. 11:** Chromosome 13 with the identified change points by the 1d fused LASSO models based on  $\text{JMIC}(\alpha = 1/2, 1/3)$ ,  $\text{PMIC}(C = 1, 10)$ , and  $\text{ZMIC}$ .  $\hat{K}$  denotes the estimated number of change points. The solid line represents the average reads ratio in each segment. The dashed line is for  $\hat{y} = 0$ , indicating no copy number change. For chromosome 13, the estimated number (or  $\hat{K} + 1$ ) of CNV segments is 4.

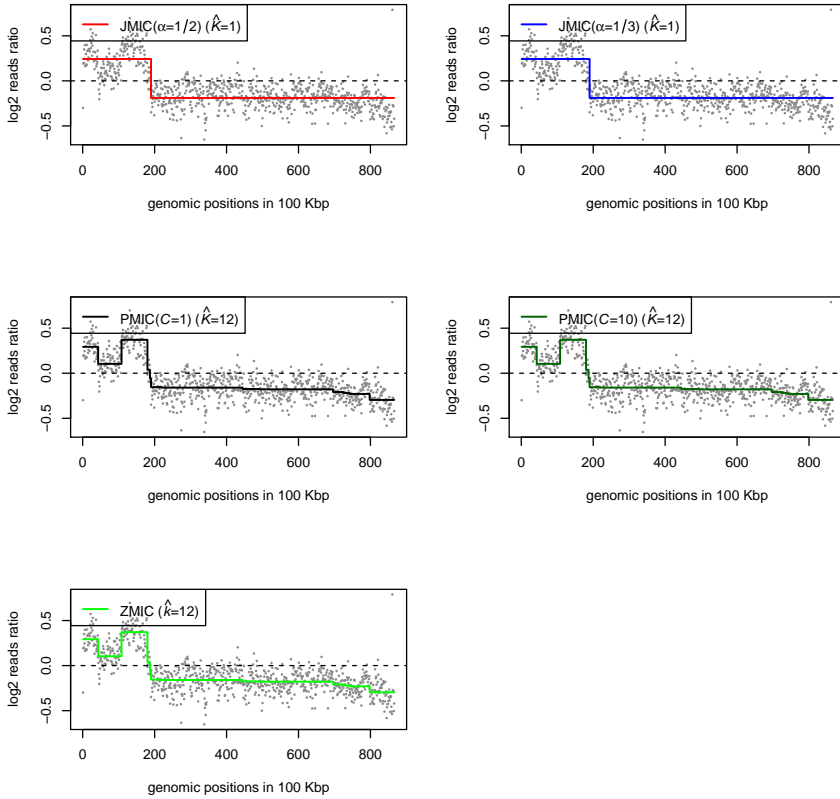

**Supplemental Fig. 12:** Chromosome 14 with the identified change points by the 1d fused LASSO models based on JMIC( $\alpha = 1/2, 1/3$ ), PMIC( $C = 1, 10$ ), and ZMIC.  $\hat{K}$  denotes the estimated number of change points. The solid line represents the average reads ratio in each segment. The dashed line is for  $\hat{y} = 0$ , indicating no copy number change. For chromosome 14, the estimated number (or  $\hat{K} + 1$ ) of CNV segments is 2.

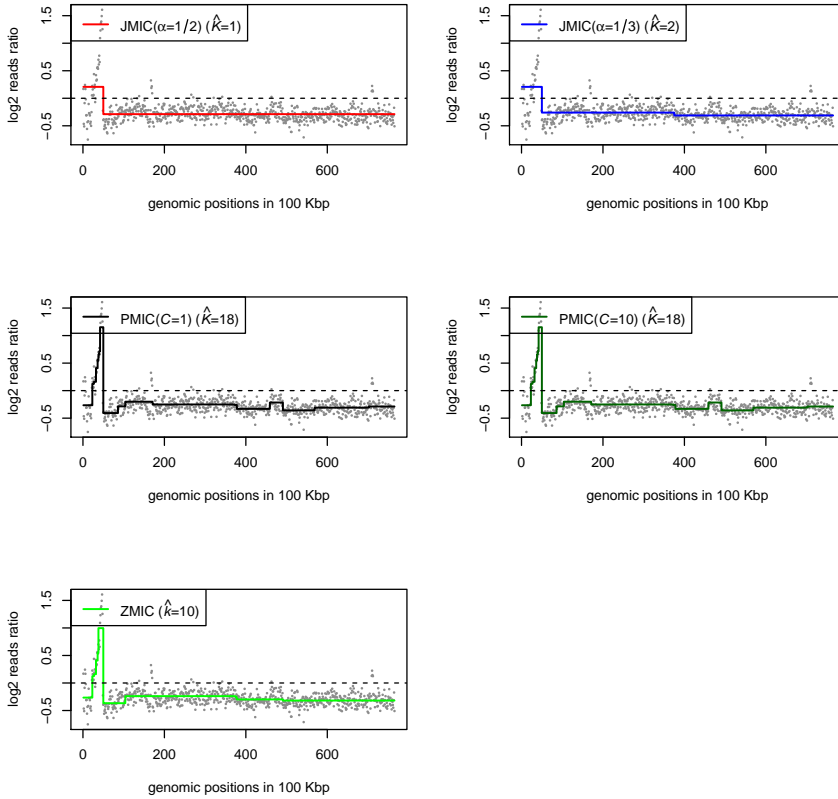

**Supplemental Fig. 13:** Chromosome 15 with the identified change points by the 1d fused LASSO models based on JMIC( $\alpha = 1/2, 1/3$ ), PMIC( $C = 1, 10$ ), and ZMIC.  $\hat{K}$  denotes the estimated number of change points. The solid line represents the average reads ratio in each segment. The dashed line is for  $\hat{y} = 0$ , indicating no copy number change. For chromosome 15, the estimated number (or  $\hat{K} + 1$ ) of CNV segments is 3.

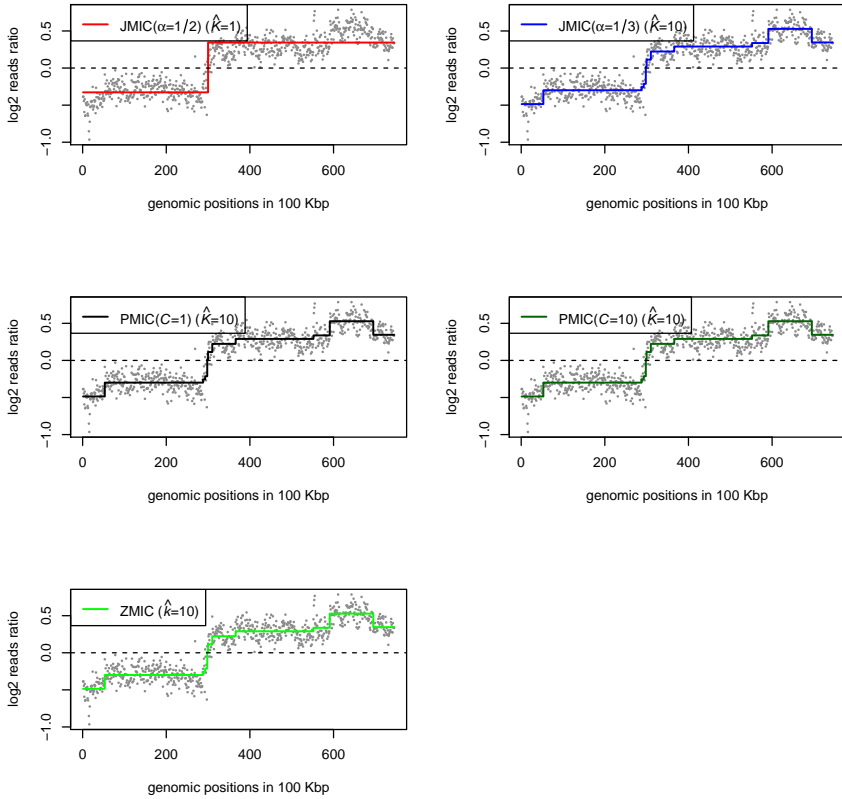

**Supplemental Fig. 14:** Chromosome 16 with the identified change points by the 1d fused LASSO models based on JMIC( $\alpha = 1/2, 1/3$ ), PMIC( $C = 1, 10$ ), and ZMIC.  $\hat{K}$  denotes the estimated number of change points. The solid line represents the average reads ratio in each segment. The dashed line is for  $\hat{y} = 0$ , indicating no copy number change. For chromosome 16, the estimated number (or  $\hat{K} + 1$ ) of CNV segments is 11.

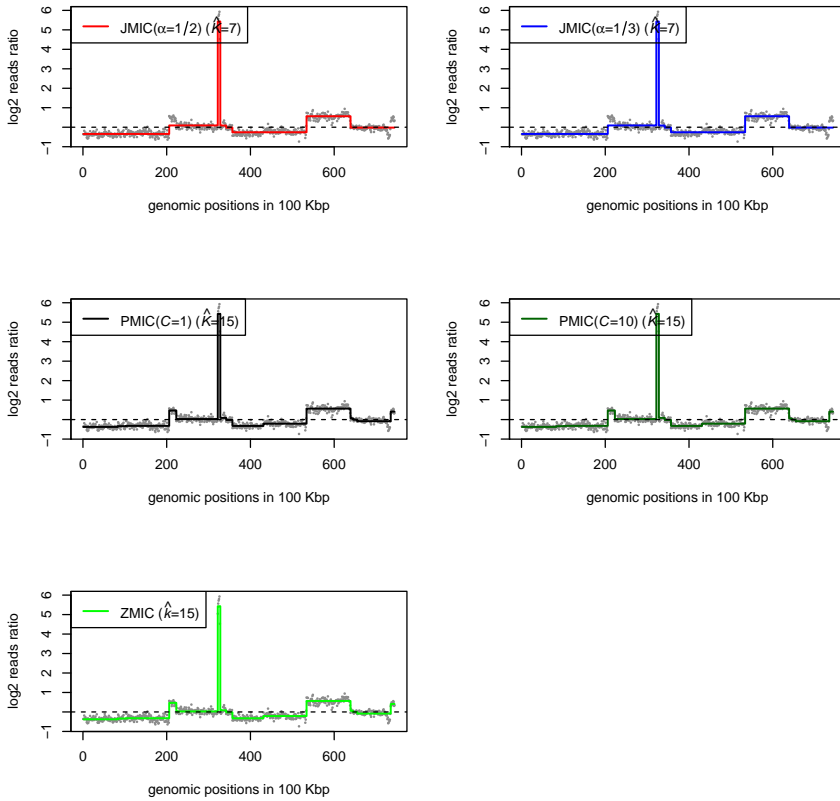

**Supplemental Fig. 15:** Chromosome 17 with the identified change points by the 1d fused LASSO models based on  $\text{JMIC}(\alpha = 1/2, 1/3)$ ,  $\text{PMIC}(C = 1, 10)$ , and  $\text{ZMIC}$ .  $\hat{K}$  denotes the estimated number of change points. The solid line represents the average reads ratio in each segment. The dashed line is for  $\hat{y} = 0$ , indicating no copy number change. For chromosome 17, the estimated number (or  $\hat{K} + 1$ ) of CNV segments is 8.

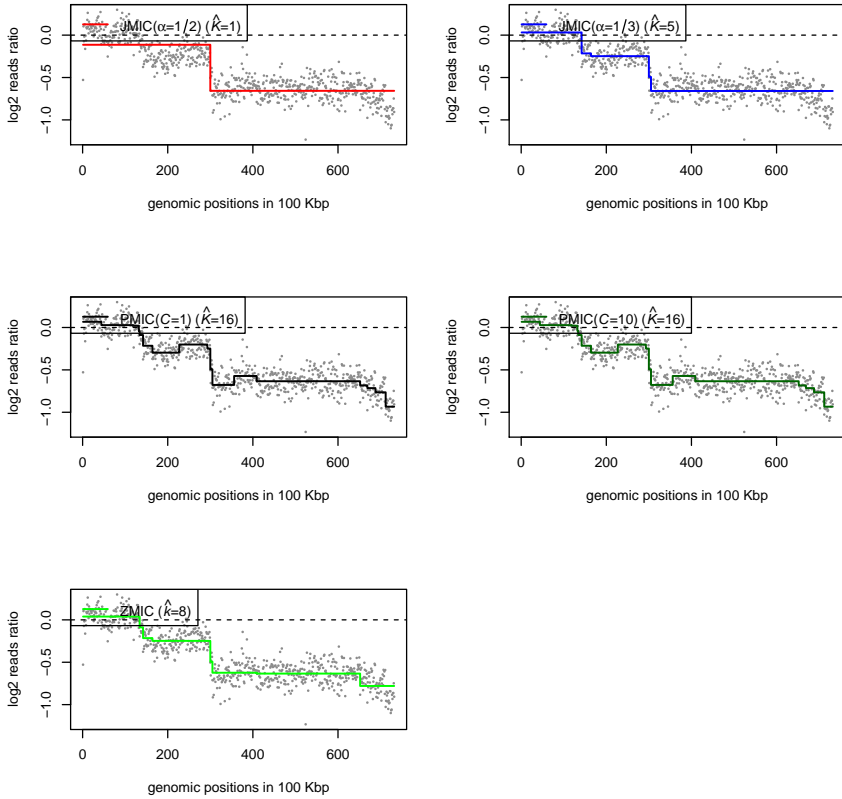

**Supplemental Fig. 16:** Chromosome 18 with the identified change points by the 1d fused LASSO models based on  $\text{JMIC}(\alpha = 1/2, 1/3)$ ,  $\text{PMIC}(C = 1, 10)$ , and  $\text{ZMIC}$ .  $\hat{K}$  denotes the estimated number of change points. The solid line represents the average reads ratio in each segment. The dashed line is for  $\hat{y} = 0$ , indicating no copy number change. For chromosome 18, the estimated number (or  $\hat{K} + 1$ ) of CNV segments is 6.



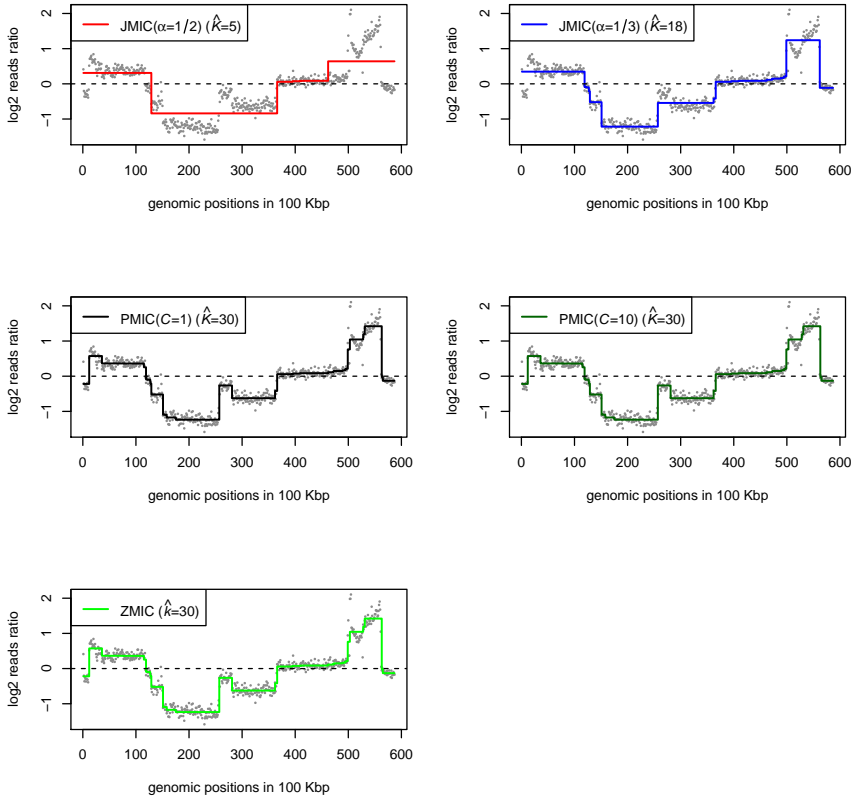

**Supplemental Fig. 17:** Chromosome 20 with the identified change points by the 1d fused LASSO models based on JMIC( $\alpha = 1/2, 1/3$ ), PMIC( $C = 1, 10$ ), and ZMIC.  $\hat{K}$  denotes the estimated number of change points. The solid line represents the average reads ratio in each segment. The dashed line is for  $\hat{y} = 0$ , indicating no copy number change. For chromosome 20, the estimated number (or  $\hat{K} + 1$ ) of CNV segments is 19.

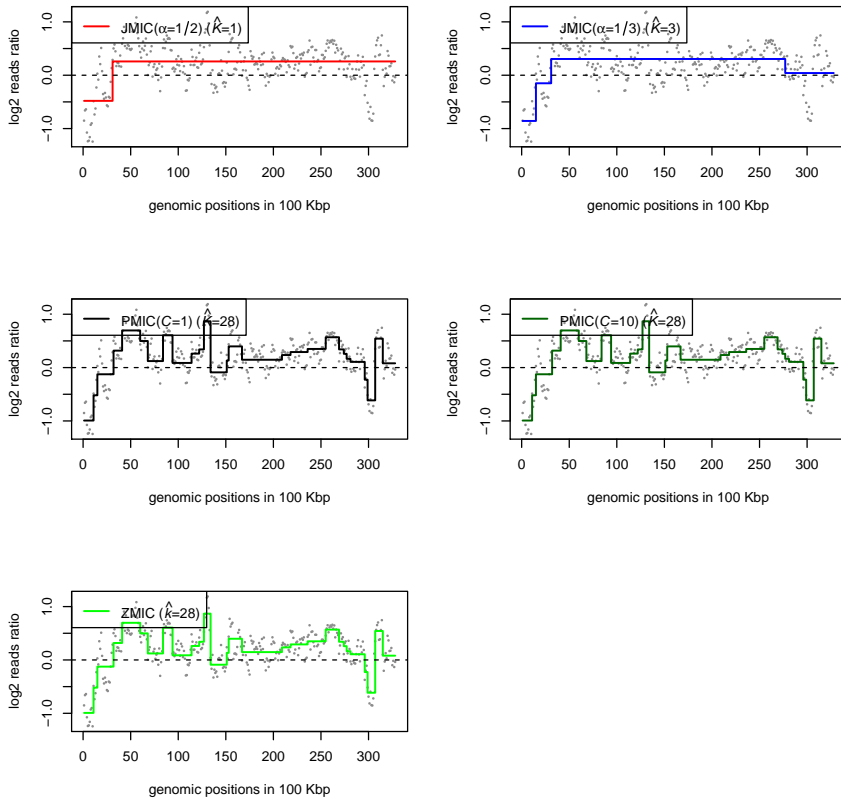

**Supplemental Fig. 18:** Chromosome 21 with the identified change points by the 1d fused LASSO models based on JMIC( $\alpha = 1/2, 1/3$ ), PMIC( $C = 1, 10$ ), and ZMIC.  $\hat{K}$  denotes the estimated number of change points. The solid line represents the average reads ratio in each segment. The dashed line is for  $\hat{y} = 0$ , indicating no copy number change. For chromosome 21, the estimated number (or  $\hat{K} + 1$ ) of CNV segments is 4.

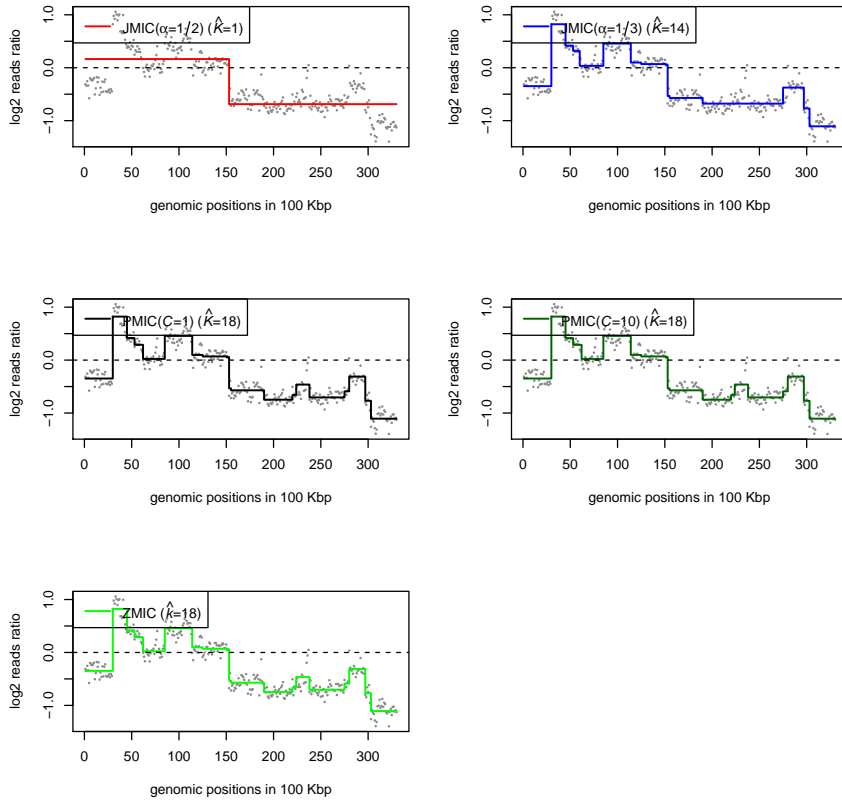

**Supplemental Fig. 19:** Chromosome 22 with the identified change points by the 1d fused LASSO models based on JMIC( $\alpha = 1/2, 1/3$ ), PMIC( $C = 1, 10$ ), and ZMIC.  $\hat{K}$  denotes the estimated number of change points. The solid line represents the average reads ratio in each segment. The dashed line is for  $\hat{y} = 0$ , indicating no copy number change. For chromosome 22, the estimated number (or  $\hat{K} + 1$ ) of CNV segments is 15.
