# Supplementary material for: A penalized regression approach for DNA copy number study using the sequencing data
Source: publisher site journal article supplement (doi:10.1515/sagmb-2018-0001), 2019-05-30
Supplement: Supplementary file 2 [file Jaeeun_JC_SAGMB_supplemental_tables_revision.pdf › Jaeeun_JC_SAGMB_supplemental_tables_revision.pdf]

|                                |                                            |                   | The estimated number of change points |   |      |     |     | Total |
|--------------------------------|--------------------------------------------|-------------------|---------------------------------------|---|------|-----|-----|-------|
| $(\mu_1, \mu_2, \mu_3, \mu_4)$ | $(\sigma_1, \sigma_2, \sigma_3, \sigma_4)$ | $(t_1, t_2, t_3)$ |                                       | 2 | 3    | 4   | 5+  |       |
| (1,2,-1,0)                     | (0.1,0.1,0.1,0.1)                          | Evenly spaced     | JMIC( $\alpha = 1/2$ )                | 0 | 1000 | 0   | 0   | 1000  |
|                                |                                            |                   | JMIC( $\alpha = 1/3$ )                | 0 | 999  | 1   | 0   |       |
|                                |                                            |                   | PMIC(C=1)                             | 0 | 974  | 23  | 3   |       |
|                                |                                            |                   | PMIC(C=10)                            | 0 | 992  | 7   | 1   |       |
|                                |                                            |                   | ZMIC                                  | 0 | 977  | 20  | 3   |       |
|                                |                                            |                   | SIC                                   | 0 | 300  | 89  | 611 |       |
|                                |                                            | Front&center      | JMIC( $\alpha = 1/2$ )                | 0 | 987  | 13  | 0   |       |
|                                |                                            |                   | JMIC( $\alpha = 1/3$ )                | 0 | 983  | 17  | 0   |       |
|                                |                                            |                   | PMIC(C=1)                             | 0 | 953  | 39  | 8   |       |
|                                |                                            |                   | PMIC(C=10)                            | 0 | 969  | 27  | 4   |       |
|                                |                                            |                   | ZMIC                                  | 0 | 962  | 33  | 5   |       |
|                                |                                            |                   | SIC                                   | 0 | 232  | 82  | 686 |       |
|                                |                                            | Front&end         | JMIC( $\alpha = 1/2$ )                | 0 | 964  | 36  | 0   |       |
|                                |                                            |                   | JMIC( $\alpha = 1/3$ )                | 0 | 963  | 37  | 0   |       |
|                                |                                            |                   | PMIC(C=1)                             | 0 | 933  | 57  | 10  |       |
|                                |                                            |                   | PMIC(C=10)                            | 0 | 938  | 54  | 8   |       |
|                                |                                            |                   | ZMIC                                  | 0 | 945  | 50  | 5   |       |
|                                |                                            |                   | SIC                                   | 0 | 172  | 88  | 740 |       |
|                                |                                            | Center&end        | JMIC( $\alpha = 1/2$ )                | 0 | 986  | 14  | 0   |       |
|                                |                                            |                   | JMIC( $\alpha = 1/3$ )                | 0 | 986  | 14  | 0   |       |
|                                |                                            |                   | PMIC(C=1)                             | 0 | 961  | 35  | 4   |       |
|                                |                                            |                   | PMIC(C=10)                            | 0 | 977  | 23  | 0   |       |
|                                |                                            |                   | ZMIC                                  | 0 | 972  | 28  | 0   |       |
|                                |                                            |                   | SIC                                   | 0 | 186  | 121 | 693 |       |

**Supplemental Table 1:** The frequencies of the number of change points  $\hat{K}$  estimated by the 1d fused LASSO with each criterion over 1000 simulations, when the true number of change points  $K = 3$  and  $n = 500$ . Evenly spaced=(125,250,375), Front& center=(50,210,290), Front&end=(50,370,450), Center&end=(210,290,450).

| $(\mu_1, \mu_2, \mu_3, \mu_4)$ | $(\sigma_1, \sigma_2, \sigma_3, \sigma_4)$ | $(t_1, t_2, t_3)$ |                        | The estimated number of change points |      |     |     | Total |
|--------------------------------|--------------------------------------------|-------------------|------------------------|---------------------------------------|------|-----|-----|-------|
|                                |                                            |                   |                        | 2                                     | 3    | 4   | 5+  |       |
| (1,2,-1,0)                     | (0.1,0.1,0.1,0.1)                          | Evenly spaced     | JMIC( $\alpha = 1/2$ ) | 0                                     | 1000 | 0   | 0   | 1000  |
|                                |                                            |                   | JMIC( $\alpha = 1/3$ ) | 0                                     | 1000 | 0   | 0   |       |
|                                |                                            |                   | PMIC(C=1)              | 0                                     | 979  | 19  | 2   |       |
|                                |                                            |                   | PMIC(C=10)             | 0                                     | 992  | 7   | 1   |       |
|                                |                                            |                   | ZMIC                   | 0                                     | 982  | 17  | 1   |       |
|                                |                                            |                   | SIC                    | 0                                     | 290  | 89  | 621 |       |
|                                |                                            | Front&center      | JMIC( $\alpha = 1/2$ ) | 0                                     | 993  | 7   | 0   |       |
|                                |                                            |                   | JMIC( $\alpha = 1/3$ ) | 0                                     | 993  | 7   | 0   |       |
|                                |                                            |                   | PMIC(C=1)              | 0                                     | 972  | 20  | 8   |       |
|                                |                                            |                   | PMIC(C=10)             | 0                                     | 979  | 13  | 8   |       |
|                                |                                            |                   | ZMIC                   | 0                                     | 976  | 16  | 8   |       |
|                                |                                            |                   | SIC                    | 0                                     | 252  | 82  | 666 |       |
|                                |                                            | Front&end         | JMIC( $\alpha = 1/2$ ) | 0                                     | 967  | 32  | 1   |       |
|                                |                                            |                   | JMIC( $\alpha = 1/3$ ) | 0                                     | 963  | 36  | 1   |       |
|                                |                                            |                   | PMIC(C=1)              | 0                                     | 939  | 46  | 15  |       |
|                                |                                            |                   | PMIC(C=10)             | 0                                     | 944  | 42  | 14  |       |
|                                |                                            |                   | ZMIC                   | 0                                     | 944  | 42  | 14  |       |
|                                |                                            |                   | SIC                    | 0                                     | 203  | 112 | 685 |       |
|                                |                                            | Center&end        | JMIC( $\alpha = 1/2$ ) | 0                                     | 994  | 6   | 0   |       |
|                                |                                            |                   | JMIC( $\alpha = 1/3$ ) | 0                                     | 993  | 7   | 0   |       |
|                                |                                            |                   | PMIC(C=1)              | 0                                     | 974  | 25  | 1   |       |
|                                |                                            |                   | PMIC(C=10)             | 0                                     | 983  | 17  | 0   |       |
|                                |                                            |                   | ZMIC                   | 0                                     | 978  | 21  | 1   |       |
|                                |                                            |                   | SIC                    | 0                                     | 214  | 122 | 664 |       |

**Supplemental Table 2:** The frequencies of the number of change points  $\hat{K}$  estimated by the 1d fused LASSO with each criterion over 1000 simulations, when the true number of change points  $K = 3$  and  $n = 1000$ . Evenly spaced=(250,500,750), Front& center=(100,420,580), Front&end=(100,740,900), Center&end=(420,580,900).

|                                |                                            |                   | The estimated number of change points |   |      |     |     | Total |
|--------------------------------|--------------------------------------------|-------------------|---------------------------------------|---|------|-----|-----|-------|
| $(\mu_1, \mu_2, \mu_3, \mu_4)$ | $(\sigma_1, \sigma_2, \sigma_3, \sigma_4)$ | $(t_1, t_2, t_3)$ |                                       | 2 | 3    | 4   | 5+  |       |
| (1,2,-1,0)                     | (0.1,0.1,0.1,0.1)                          | Evenly spaced     | JMIC( $\alpha = 1/2$ )                | 0 | 1000 | 0   | 0   | 1000  |
|                                |                                            |                   | JMIC( $\alpha = 1/3$ )                | 0 | 1000 | 0   | 0   |       |
|                                |                                            |                   | PMIC(C=1)                             | 0 | 986  | 14  | 0   |       |
|                                |                                            |                   | PMIC(C=10)                            | 0 | 993  | 7   | 0   |       |
|                                |                                            |                   | ZMIC                                  | 0 | 988  | 12  | 0   |       |
|                                |                                            |                   | SIC                                   | 0 | 304  | 95  | 601 |       |
|                                |                                            | Front&center      | JMIC( $\alpha = 1/2$ )                | 0 | 988  | 12  | 0   |       |
|                                |                                            |                   | JMIC( $\alpha = 1/3$ )                | 0 | 988  | 12  | 0   |       |
|                                |                                            |                   | PMIC(C=1)                             | 0 | 966  | 26  | 8   |       |
|                                |                                            |                   | PMIC(C=10)                            | 0 | 975  | 18  | 7   |       |
|                                |                                            |                   | ZMIC                                  | 0 | 971  | 23  | 6   |       |
|                                |                                            |                   | SIC                                   | 0 | 269  | 79  | 652 |       |
|                                |                                            | Front&end         | JMIC( $\alpha = 1/2$ )                | 0 | 960  | 40  | 0   |       |
|                                |                                            |                   | JMIC( $\alpha = 1/3$ )                | 0 | 959  | 41  | 0   |       |
|                                |                                            |                   | PMIC(C=1)                             | 0 | 942  | 51  | 7   |       |
|                                |                                            |                   | PMIC(C=10)                            | 0 | 950  | 44  | 6   |       |
|                                |                                            |                   | ZMIC                                  | 0 | 946  | 49  | 5   |       |
|                                |                                            |                   | SIC                                   | 0 | 200  | 112 | 688 |       |
|                                |                                            | Center&end        | JMIC( $\alpha = 1/2$ )                | 0 | 991  | 9   | 0   |       |
|                                |                                            |                   | JMIC( $\alpha = 1/3$ )                | 0 | 990  | 10  | 0   |       |
|                                |                                            |                   | PMIC(C=1)                             | 0 | 973  | 27  | 0   |       |
|                                |                                            |                   | PMIC(C=10)                            | 0 | 980  | 20  | 0   |       |
|                                |                                            |                   | ZMIC                                  | 0 | 976  | 24  | 0   |       |
|                                |                                            |                   | SIC                                   | 0 | 206  | 118 | 676 |       |

**Supplemental Table 3:** The frequencies of the number of change points  $\hat{K}$  estimated by the 1d fused LASSO with each criterion over 1000 simulations, when the true number of change points  $K = 3$  and  $n = 1500$ . Evenly spaced=(375,750,1125), Front& center=(150,630,870), Front&end=(150,1110,1350), Center&end=(630,870,1350).

| $(\mu_1, \mu_2, \mu_3, \mu_4)$ | $(\sigma_1, \sigma_2, \sigma_3, \sigma_4)$ | $(t_1, t_2, t_3)$ |                        | The estimated number of change points |      |     |     | Total |
|--------------------------------|--------------------------------------------|-------------------|------------------------|---------------------------------------|------|-----|-----|-------|
|                                |                                            |                   |                        | 2                                     | 3    | 4   | 5+  |       |
| (1,2,-1,0)                     | (0.1,0.1,0.1,0.1)                          | Evenly spaced     | JMIC( $\alpha = 1/2$ ) | 0                                     | 1000 | 0   | 0   | 1000  |
|                                |                                            |                   | JMIC( $\alpha = 1/3$ ) | 0                                     | 1000 | 0   | 0   |       |
|                                |                                            |                   | PMIC(C=1)              | 0                                     | 988  | 11  | 1   |       |
|                                |                                            |                   | PMIC(C=10)             | 0                                     | 996  | 3   | 1   |       |
|                                |                                            |                   | ZMIC                   | 0                                     | 989  | 10  | 1   |       |
|                                |                                            |                   | SIC                    | 0                                     | 284  | 89  | 627 |       |
|                                |                                            | Front&center      | JMIC( $\alpha = 1/2$ ) | 0                                     | 987  | 13  | 0   |       |
|                                |                                            |                   | JMIC( $\alpha = 1/3$ ) | 0                                     | 985  | 15  | 0   |       |
|                                |                                            |                   | PMIC(C=1)              | 0                                     | 974  | 21  | 5   |       |
|                                |                                            |                   | PMIC(C=10)             | 0                                     | 981  | 15  | 4   |       |
|                                |                                            |                   | ZMIC                   | 0                                     | 976  | 20  | 4   |       |
|                                |                                            |                   | SIC                    | 0                                     | 242  | 65  | 693 |       |
|                                |                                            | Front&end         | JMIC( $\alpha = 1/2$ ) | 0                                     | 964  | 36  | 0   |       |
|                                |                                            |                   | JMIC( $\alpha = 1/3$ ) | 0                                     | 961  | 39  | 0   |       |
|                                |                                            |                   | PMIC(C=1)              | 0                                     | 947  | 45  | 8   |       |
|                                |                                            |                   | PMIC(C=10)             | 0                                     | 950  | 44  | 6   |       |
|                                |                                            |                   | ZMIC                   | 0                                     | 948  | 45  | 7   |       |
|                                |                                            |                   | SIC                    | 0                                     | 208  | 96  | 696 |       |
|                                |                                            | Center&end        | JMIC( $\alpha = 1/2$ ) | 0                                     | 988  | 12  | 0   |       |
|                                |                                            |                   | JMIC( $\alpha = 1/3$ ) | 0                                     | 988  | 12  | 0   |       |
|                                |                                            |                   | PMIC(C=1)              | 0                                     | 977  | 23  | 0   |       |
|                                |                                            |                   | PMIC(C=10)             | 0                                     | 985  | 15  | 0   |       |
|                                |                                            |                   | ZMIC                   | 0                                     | 979  | 21  | 0   |       |
|                                |                                            |                   | SIC                    | 0                                     | 221  | 105 | 674 |       |

**Supplemental Table 4:** The frequencies of the number of change points  $\hat{K}$  estimated by the 1d fused LASSO with each criterion over 1000 simulations, when the true number of change points  $K = 3$  and  $n = 2000$ . Evenly spaced=(500,1000,1500), Front& center=(200,840,1160), Front&end=(200,1480,1800), Center&end=(840,1160,1800).

| $(\mu_1, \mu_2, \mu_3, \mu_4)$ | $(\sigma_1, \sigma_2, \sigma_3, \sigma_4)$ | $(t_1, t_2, t_3)$ |                        | The estimated number of change points |      |     |     | Total |
|--------------------------------|--------------------------------------------|-------------------|------------------------|---------------------------------------|------|-----|-----|-------|
|                                |                                            |                   |                        | 2                                     | 3    | 4   | 5+  |       |
| (1,2,-1,0)                     | (0.1,0.1,0.1,0.1)                          | Evenly spaced     | JMIC( $\alpha = 1/2$ ) | 0                                     | 1000 | 0   | 0   | 1000  |
|                                |                                            |                   | JMIC( $\alpha = 1/3$ ) | 0                                     | 1000 | 0   | 0   |       |
|                                |                                            |                   | PMIC(C=1)              | 0                                     | 990  | 10  | 0   |       |
|                                |                                            |                   | PMIC(C=10)             | 0                                     | 994  | 6   | 0   |       |
|                                |                                            |                   | ZMIC                   | 0                                     | 991  | 9   | 0   |       |
|                                |                                            |                   | SIC                    | 0                                     | 301  | 74  | 625 |       |
|                                |                                            | Front&center      | JMIC( $\alpha = 1/2$ ) | 0                                     | 991  | 9   | 0   |       |
|                                |                                            |                   | JMIC( $\alpha = 1/3$ ) | 0                                     | 989  | 11  | 0   |       |
|                                |                                            |                   | PMIC(C=1)              | 0                                     | 980  | 16  | 4   |       |
|                                |                                            |                   | PMIC(C=10)             | 0                                     | 982  | 14  | 4   |       |
|                                |                                            |                   | ZMIC                   | 0                                     | 981  | 15  | 4   |       |
|                                |                                            |                   | SIC                    | 0                                     | 247  | 84  | 669 |       |
|                                |                                            | Front&end         | JMIC( $\alpha = 1/2$ ) | 0                                     | 974  | 24  | 2   |       |
|                                |                                            |                   | JMIC( $\alpha = 1/3$ ) | 0                                     | 971  | 27  | 2   |       |
|                                |                                            |                   | PMIC(C=1)              | 0                                     | 954  | 34  | 12  |       |
|                                |                                            |                   | PMIC(C=10)             | 0                                     | 961  | 29  | 10  |       |
|                                |                                            |                   | ZMIC                   | 0                                     | 957  | 33  | 10  |       |
|                                |                                            |                   | SIC                    | 0                                     | 224  | 98  | 678 |       |
|                                |                                            | Center&end        | JMIC( $\alpha = 1/2$ ) | 0                                     | 991  | 9   | 0   |       |
|                                |                                            |                   | JMIC( $\alpha = 1/3$ ) | 0                                     | 991  | 9   | 0   |       |
|                                |                                            |                   | PMIC(C=1)              | 0                                     | 984  | 15  | 1   |       |
|                                |                                            |                   | PMIC(C=10)             | 0                                     | 991  | 9   | 0   |       |
|                                |                                            |                   | ZMIC                   | 0                                     | 984  | 15  | 1   |       |
|                                |                                            |                   | SIC                    | 0                                     | 213  | 120 | 667 |       |

**Supplemental Table 5:** The frequencies of the number of change points  $\hat{K}$  estimated by the 1d fused LASSO with each criterion over 1000 simulations, when the true number of change points  $K = 3$  and  $n = 3000$ . Evenly spaced=(750,1500,2250), Front& center=(300,1260,1740), Front&end=(300,2220,2700), Center&end=(1260,1740,2700).

| $(\mu_1, \mu_2, \mu_3, \mu_4)$ | $(\sigma_1, \sigma_2, \sigma_3, \sigma_4)$ | $(t_1, t_2, t_3)$ |                        | The estimated number of change points |      |     |     | Total |
|--------------------------------|--------------------------------------------|-------------------|------------------------|---------------------------------------|------|-----|-----|-------|
|                                |                                            |                   |                        | 2                                     | 3    | 4   | 5+  |       |
| (1,2,-1,0)                     | (0.1,0.1,0.1,0.1)                          | Evenly spaced     | JMIC( $\alpha = 1/2$ ) | 0                                     | 1000 | 0   | 0   | 1000  |
|                                |                                            |                   | JMIC( $\alpha = 1/3$ ) | 0                                     | 1000 | 0   | 0   |       |
|                                |                                            |                   | PMIC(C=1)              | 0                                     | 996  | 4   | 0   |       |
|                                |                                            |                   | PMIC(C=10)             | 0                                     | 999  | 1   | 0   |       |
|                                |                                            |                   | ZMIC                   | 0                                     | 997  | 3   | 0   |       |
|                                |                                            |                   | SIC                    | 0                                     | 281  | 103 | 616 |       |
|                                |                                            | Front&center      | JMIC( $\alpha = 1/2$ ) | 0                                     | 987  | 13  | 0   |       |
|                                |                                            |                   | JMIC( $\alpha = 1/3$ ) | 0                                     | 986  | 14  | 0   |       |
|                                |                                            |                   | PMIC(C=1)              | 0                                     | 968  | 25  | 7   |       |
|                                |                                            |                   | PMIC(C=10)             | 0                                     | 976  | 18  | 6   |       |
|                                |                                            |                   | ZMIC                   | 0                                     | 971  | 23  | 6   |       |
|                                |                                            |                   | SIC                    | 0                                     | 260  | 86  | 654 |       |
|                                |                                            | Front&end         | JMIC( $\alpha = 1/2$ ) | 0                                     | 975  | 24  | 1   |       |
|                                |                                            |                   | JMIC( $\alpha = 1/3$ ) | 0                                     | 972  | 27  | 1   |       |
|                                |                                            |                   | PMIC(C=1)              | 0                                     | 956  | 34  | 10  |       |
|                                |                                            |                   | PMIC(C=10)             | 0                                     | 963  | 30  | 7   |       |
|                                |                                            |                   | ZMIC                   | 0                                     | 959  | 32  | 9   |       |
|                                |                                            |                   | SIC                    | 0                                     | 193  | 104 | 703 |       |
|                                |                                            | Center&end        | JMIC( $\alpha = 1/2$ ) | 0                                     | 993  | 7   | 0   |       |
|                                |                                            |                   | JMIC( $\alpha = 1/3$ ) | 0                                     | 992  | 8   | 0   |       |
|                                |                                            |                   | PMIC(C=1)              | 0                                     | 983  | 17  | 0   |       |
|                                |                                            |                   | PMIC(C=10)             | 0                                     | 988  | 12  | 0   |       |
|                                |                                            |                   | ZMIC                   | 0                                     | 983  | 17  | 0   |       |
|                                |                                            |                   | SIC                    | 0                                     | 233  | 132 | 635 |       |

**Supplemental Table 6:** The frequencies of the number of change points  $\hat{K}$  estimated by the 1d fused LASSO with each criterion over 1000 simulations, when the true number of change points  $K = 3$  and  $n = 4500$ . Evenly spaced=(1125,2250,3375), Front& center=(450,1890,2610), Front&end=(450,3330,4050), Center&end=(1890,2610,4050).

|                                |                                            |                   | The estimated number of change points |   |      |     |     | Total |
|--------------------------------|--------------------------------------------|-------------------|---------------------------------------|---|------|-----|-----|-------|
| $(\mu_1, \mu_2, \mu_3, \mu_4)$ | $(\sigma_1, \sigma_2, \sigma_3, \sigma_4)$ | $(t_1, t_2, t_3)$ |                                       | 2 | 3    | 4   | 5+  |       |
| (1,2,-1,0)                     | (0.1,0.1,0.1,0.1)                          | Evenly spaced     | JMIC( $\alpha = 1/2$ )                | 0 | 1000 | 0   | 0   | 1000  |
|                                |                                            |                   | JMIC( $\alpha = 1/3$ )                | 0 | 1000 | 0   | 0   |       |
|                                |                                            |                   | PMIC(C=1)                             | 0 | 995  | 5   | 0   |       |
|                                |                                            |                   | PMIC(C=10)                            | 0 | 997  | 3   | 0   |       |
|                                |                                            |                   | ZMIC                                  | 0 | 995  | 5   | 0   |       |
|                                |                                            |                   | SIC                                   | 0 | 307  | 86  | 607 |       |
|                                |                                            | Front&center      | JMIC( $\alpha = 1/2$ )                | 0 | 986  | 14  | 0   |       |
|                                |                                            |                   | JMIC( $\alpha = 1/3$ )                | 0 | 986  | 14  | 0   |       |
|                                |                                            |                   | PMIC(C=1)                             | 0 | 971  | 23  | 6   |       |
|                                |                                            |                   | PMIC(C=10)                            | 0 | 979  | 17  | 4   |       |
|                                |                                            |                   | ZMIC                                  | 0 | 973  | 22  | 5   |       |
|                                |                                            |                   | SIC                                   | 0 | 279  | 83  | 638 |       |
|                                |                                            | Front&end         | JMIC( $\alpha = 1/2$ )                | 0 | 970  | 30  | 0   |       |
|                                |                                            |                   | JMIC( $\alpha = 1/3$ )                | 0 | 970  | 30  | 0   |       |
|                                |                                            |                   | PMIC(C=1)                             | 0 | 958  | 35  | 7   |       |
|                                |                                            |                   | PMIC(C=10)                            | 0 | 963  | 30  | 7   |       |
|                                |                                            |                   | ZMIC                                  | 0 | 959  | 34  | 7   |       |
|                                |                                            |                   | SIC                                   | 0 | 209  | 103 | 688 |       |
|                                |                                            | Center&end        | JMIC( $\alpha = 1/2$ )                | 0 | 993  | 7   | 0   |       |
|                                |                                            |                   | JMIC( $\alpha = 1/3$ )                | 0 | 992  | 8   | 0   |       |
|                                |                                            |                   | PMIC(C=1)                             | 0 | 990  | 10  | 0   |       |
|                                |                                            |                   | PMIC(C=10)                            | 0 | 992  | 8   | 0   |       |
|                                |                                            |                   | ZMIC                                  | 0 | 991  | 9   | 0   |       |
|                                |                                            |                   | SIC                                   | 0 | 218  | 110 | 672 |       |

**Supplemental Table 7:** The frequencies of the number of change points  $\hat{K}$  estimated by the 1d fused LASSO with each criterion over 1000 simulations, when the true number of change points  $K = 3$  and  $n = 6000$ . Evenly spaced=(1500,3000,4500), Front& center=(600,2520,3480), Front&end=(600,4440,5400), Center&end=(2520,3480,5400).

| $(\mu_1, \mu_2, \mu_3, \mu_4)$ | $(\sigma_1, \sigma_2, \sigma_3, \sigma_4)$ | $(t_1, t_2, t_3)$ |                        | The estimated number of change points |      |     |     | Total |
|--------------------------------|--------------------------------------------|-------------------|------------------------|---------------------------------------|------|-----|-----|-------|
|                                |                                            |                   |                        | 2                                     | 3    | 4   | 5+  |       |
| (1,2,-1,0)                     | (0.1,0.1,0.1,0.1)                          | Evenly spaced     | JMIC( $\alpha = 1/2$ ) | 0                                     | 1000 | 0   | 0   | 1000  |
|                                |                                            |                   | JMIC( $\alpha = 1/3$ ) | 0                                     | 1000 | 0   | 0   |       |
|                                |                                            |                   | PMIC(C=1)              | 0                                     | 994  | 6   | 0   |       |
|                                |                                            |                   | PMIC(C=10)             | 0                                     | 998  | 2   | 0   |       |
|                                |                                            |                   | ZMIC                   | 0                                     | 994  | 6   | 0   |       |
|                                |                                            |                   | SIC                    | 0                                     | 304  | 71  | 625 |       |
|                                |                                            | Front&center      | JMIC( $\alpha = 1/2$ ) | 0                                     | 982  | 18  | 0   |       |
|                                |                                            |                   | JMIC( $\alpha = 1/3$ ) | 0                                     | 981  | 19  | 0   |       |
|                                |                                            |                   | PMIC(C=1)              | 0                                     | 965  | 29  | 6   |       |
|                                |                                            |                   | PMIC(C=10)             | 0                                     | 974  | 23  | 3   |       |
|                                |                                            |                   | ZMIC                   | 0                                     | 967  | 28  | 5   |       |
|                                |                                            |                   | SIC                    | 0                                     | 273  | 82  | 645 |       |
|                                |                                            | Front&end         | JMIC( $\alpha = 1/2$ ) | 0                                     | 970  | 28  | 2   |       |
|                                |                                            |                   | JMIC( $\alpha = 1/3$ ) | 0                                     | 970  | 28  | 2   |       |
|                                |                                            |                   | PMIC(C=1)              | 0                                     | 953  | 33  | 14  |       |
|                                |                                            |                   | PMIC(C=10)             | 0                                     | 957  | 33  | 10  |       |
|                                |                                            |                   | ZMIC                   | 0                                     | 957  | 32  | 11  |       |
|                                |                                            |                   | SIC                    | 0                                     | 221  | 88  | 691 |       |
|                                |                                            | Center&end        | JMIC( $\alpha = 1/2$ ) | 0                                     | 988  | 12  | 0   |       |
|                                |                                            |                   | JMIC( $\alpha = 1/3$ ) | 0                                     | 988  | 12  | 0   |       |
|                                |                                            |                   | PMIC(C=1)              | 0                                     | 986  | 13  | 1   |       |
|                                |                                            |                   | PMIC(C=10)             | 0                                     | 988  | 12  | 0   |       |
|                                |                                            |                   | ZMIC                   | 0                                     | 986  | 13  | 1   |       |
|                                |                                            |                   | SIC                    | 0                                     | 221  | 142 | 637 |       |

**Supplemental Table 8:** The frequencies of the number of change points  $\hat{K}$  estimated by the 1d fused LASSO with each criterion over 1000 simulations, when the true number of change points  $K = 3$  and  $n = 7500$ . Evenly spaced=(1875,3750,5625), Front& center=(750,3150,4350), Front&end=(750,5550,6750), Center&end=(3150,4350,6750).



| $(\mu_1, \dots, \mu_6)$ | $(\sigma_1, \dots, \sigma_6)$ | $(t_1, \dots, t_5)$ |                        | The estimated number of change points |      |     |     | Total |
|-------------------------|-------------------------------|---------------------|------------------------|---------------------------------------|------|-----|-----|-------|
|                         |                               |                     |                        | 4                                     | 5    | 6   | 7+  |       |
| (1,-1,0,-1,2,1)         | (0.1, ..., 0.1)               | Evenly spaced       | JMIC( $\alpha = 1/2$ ) | 0                                     | 1000 | 0   | 0   | 1000  |
|                         |                               |                     | JMIC( $\alpha = 1/3$ ) | 0                                     | 1000 | 0   | 0   |       |
|                         |                               |                     | PMIC(C=1)              | 0                                     | 963  | 33  | 4   |       |
|                         |                               |                     | PMIC(C=10)             | 0                                     | 968  | 30  | 2   |       |
|                         |                               |                     | ZMIC                   | 0                                     | 970  | 28  | 2   |       |
|                         |                               |                     | SIC                    | 0                                     | 427  | 127 | 446 |       |
|                         |                               | Front& center       | JMIC( $\alpha = 1/2$ ) | 0                                     | 926  | 74  | 0   |       |
|                         |                               |                     | JMIC( $\alpha = 1/3$ ) | 0                                     | 923  | 77  | 0   |       |
|                         |                               |                     | PMIC(C=1)              | 0                                     | 886  | 102 | 12  |       |
|                         |                               |                     | PMIC(C=10)             | 0                                     | 894  | 94  | 12  |       |
|                         |                               |                     | ZMIC                   | 0                                     | 899  | 91  | 10  |       |
|                         |                               |                     | SIC                    | 0                                     | 283  | 110 | 607 |       |
|                         |                               | Front&end           | JMIC( $\alpha = 1/2$ ) | 0                                     | 924  | 74  | 2   |       |
|                         |                               |                     | JMIC( $\alpha = 1/3$ ) | 0                                     | 924  | 74  | 2   |       |
|                         |                               |                     | PMIC(C=1)              | 0                                     | 896  | 94  | 10  |       |
|                         |                               |                     | PMIC(C=10)             | 0                                     | 896  | 93  | 11  |       |
|                         |                               |                     | ZMIC                   | 0                                     | 906  | 86  | 8   |       |
|                         |                               |                     | SIC                    | 0                                     | 229  | 145 | 626 |       |
|                         |                               | Center&end          | JMIC( $\alpha = 1/2$ ) | 0                                     | 854  | 139 | 7   |       |
|                         |                               |                     | JMIC( $\alpha = 1/3$ ) | 0                                     | 854  | 139 | 7   |       |
|                         |                               |                     | PMIC(C=1)              | 0                                     | 828  | 160 | 12  |       |
|                         |                               |                     | PMIC(C=10)             | 0                                     | 836  | 153 | 11  |       |
|                         |                               |                     | ZMIC                   | 0                                     | 836  | 155 | 9   |       |
|                         |                               |                     | SIC                    | 0                                     | 211  | 194 | 595 |       |

**Supplemental Table 9:** The frequencies of the number of change points  $\hat{K}$  estimated by the 1d fused LASSO with each criterion over 1000 simulations, when the true number of change points  $K = 5$  and  $n = 500$ . Evenly spaced=(83,166,250,333,416), Front& center=(17,70,197,250,303), Front&end=(33,86,360,413,467), Center&end=(197,250,360,413,467).

| $(\mu_1, \dots, \mu_6)$ | $(\sigma_1, \dots, \sigma_6)$ | $(t_1, \dots, t_5)$ |                        | The estimated number of change points |      |     |     | Total |
|-------------------------|-------------------------------|---------------------|------------------------|---------------------------------------|------|-----|-----|-------|
|                         |                               |                     |                        | 4                                     | 5    | 6   | 7+  |       |
| (1,-1,0,-1,2,1)         | (0.1, ..., 0.1)               | Evenly spaced       | JMIC( $\alpha = 1/2$ ) | 0                                     | 1000 | 0   | 0   | 1000  |
|                         |                               |                     | JMIC( $\alpha = 1/3$ ) | 0                                     | 1000 | 0   | 0   |       |
|                         |                               |                     | PMIC(C=1)              | 0                                     | 979  | 20  | 1   |       |
|                         |                               |                     | PMIC(C=10)             | 0                                     | 985  | 14  | 1   |       |
|                         |                               |                     | ZMIC                   | 0                                     | 983  | 16  | 1   |       |
|                         |                               |                     | SIC                    | 0                                     | 416  | 136 | 448 |       |
|                         |                               | Front& center       | JMIC( $\alpha = 1/2$ ) | 0                                     | 913  | 86  | 1   |       |
|                         |                               |                     | JMIC( $\alpha = 1/3$ ) | 0                                     | 909  | 89  | 2   |       |
|                         |                               |                     | PMIC(C=1)              | 0                                     | 893  | 93  | 14  |       |
|                         |                               |                     | PMIC(C=10)             | 0                                     | 897  | 91  | 12  |       |
|                         |                               |                     | ZMIC                   | 0                                     | 898  | 91  | 11  |       |
|                         |                               |                     | SIC                    | 0                                     | 286  | 135 | 579 |       |
|                         |                               | Front&end           | JMIC( $\alpha = 1/2$ ) | 0                                     | 904  | 93  | 3   |       |
|                         |                               |                     | JMIC( $\alpha = 1/3$ ) | 0                                     | 900  | 97  | 3   |       |
|                         |                               |                     | PMIC(C=1)              | 0                                     | 881  | 111 | 8   |       |
|                         |                               |                     | PMIC(C=10)             | 0                                     | 884  | 109 | 7   |       |
|                         |                               |                     | ZMIC                   | 0                                     | 883  | 110 | 7   |       |
|                         |                               |                     | SIC                    | 0                                     | 216  | 145 | 639 |       |
|                         |                               | Center&end          | JMIC( $\alpha = 1/2$ ) | 0                                     | 872  | 118 | 10  |       |
|                         |                               |                     | JMIC( $\alpha = 1/3$ ) | 0                                     | 872  | 118 | 10  |       |
|                         |                               |                     | PMIC(C=1)              | 0                                     | 850  | 139 | 11  |       |
|                         |                               |                     | PMIC(C=10)             | 0                                     | 859  | 129 | 12  |       |
|                         |                               |                     | ZMIC                   | 0                                     | 856  | 134 | 10  |       |
|                         |                               |                     | SIC                    | 0                                     | 216  | 187 | 597 |       |

**Supplemental Table 10:** The frequencies of the number of change points  $\hat{K}$  estimated by the 1d fused LASSO with each criterion over 1000 simulations, when the true number of change points  $K = 5$  and  $n = 1000$ . Evenly spaced=(166,333,500,666,833), Front& center=(33,140,393,500,607), Front&end=(67,174,719,826,933), Center&end=(393,500,719,826,933).

| $(\mu_1, \dots, \mu_6)$ | $(\sigma_1, \dots, \sigma_6)$ | $(t_1, \dots, t_5)$ |                        | The estimated number of change points |      |     |     | Total |
|-------------------------|-------------------------------|---------------------|------------------------|---------------------------------------|------|-----|-----|-------|
|                         |                               |                     |                        | 4                                     | 5    | 6   | 7+  |       |
| (1,-1,0,-1,2,1)         | (0.1,...,0.1)                 | Evenly spaced       | JMIC( $\alpha = 1/2$ ) | 0                                     | 1000 | 0   | 0   | 1000  |
|                         |                               |                     | JMIC( $\alpha = 1/3$ ) | 0                                     | 1000 | 0   | 0   |       |
|                         |                               |                     | PMIC(C=1)              | 0                                     | 986  | 12  | 2   |       |
|                         |                               |                     | PMIC(C=10)             | 0                                     | 993  | 6   | 1   |       |
|                         |                               |                     | ZMIC                   | 0                                     | 992  | 7   | 1   |       |
|                         |                               |                     | SIC                    | 0                                     | 416  | 144 | 440 |       |
|                         |                               | Front& center       | JMIC( $\alpha = 1/2$ ) | 0                                     | 924  | 74  | 2   |       |
|                         |                               |                     | JMIC( $\alpha = 1/3$ ) | 0                                     | 922  | 76  | 2   |       |
|                         |                               |                     | PMIC(C=1)              | 0                                     | 897  | 82  | 21  |       |
|                         |                               |                     | PMIC(C=10)             | 0                                     | 902  | 80  | 18  |       |
|                         |                               |                     | ZMIC                   | 0                                     | 902  | 81  | 17  |       |
|                         |                               |                     | SIC                    | 0                                     | 262  | 139 | 599 |       |
|                         |                               | Front&end           | JMIC( $\alpha = 1/2$ ) | 0                                     | 903  | 97  | 0   |       |
|                         |                               |                     | JMIC( $\alpha = 1/3$ ) | 0                                     | 902  | 98  | 0   |       |
|                         |                               |                     | PMIC(C=1)              | 0                                     | 885  | 106 | 9   |       |
|                         |                               |                     | PMIC(C=10)             | 0                                     | 888  | 103 | 9   |       |
|                         |                               |                     | ZMIC                   | 0                                     | 891  | 102 | 7   |       |
|                         |                               |                     | SIC                    | 0                                     | 223  | 164 | 613 |       |
|                         |                               | Center&end          | JMIC( $\alpha = 1/2$ ) | 0                                     | 853  | 140 | 7   |       |
|                         |                               |                     | JMIC( $\alpha = 1/3$ ) | 0                                     | 853  | 140 | 7   |       |
|                         |                               |                     | PMIC(C=1)              | 0                                     | 841  | 151 | 8   |       |
|                         |                               |                     | PMIC(C=10)             | 0                                     | 844  | 148 | 8   |       |
|                         |                               |                     | ZMIC                   | 0                                     | 843  | 149 | 8   |       |
|                         |                               |                     | SIC                    | 0                                     | 235  | 154 | 611 |       |

**Supplemental Table 11:** The frequencies of the number of change points  $\hat{K}$  estimated by the 1d fused LASSO with each criterion over 1000 simulations, when the true number of change points  $K = 5$  and  $n = 1500$ . Evenly spaced=(250,500,750,1000,1250), Front& center=(50,210,590,750,910), Front&end=(100,260,1080,1240,1400), Center&end=(590,750,1080,1240,1400).

| $(\mu_1, \dots, \mu_6)$ | $(\sigma_1, \dots, \sigma_6)$ | $(t_1, \dots, t_5)$ |                        | The estimated number of change points |      |     |     | Total |
|-------------------------|-------------------------------|---------------------|------------------------|---------------------------------------|------|-----|-----|-------|
|                         |                               |                     |                        | 4                                     | 5    | 6   | 7+  |       |
| (1,-1,0,-1,2,1)         | (0.1, ..., 0.1)               | Evenly spaced       | JMIC( $\alpha = 1/2$ ) | 0                                     | 1000 | 0   | 0   | 1000  |
|                         |                               |                     | JMIC( $\alpha = 1/3$ ) | 0                                     | 1000 | 0   | 0   |       |
|                         |                               |                     | PMIC(C=1)              | 0                                     | 983  | 14  | 3   |       |
|                         |                               |                     | PMIC(C=10)             | 0                                     | 990  | 10  | 0   |       |
|                         |                               |                     | ZMIC                   | 0                                     | 989  | 11  | 0   |       |
|                         |                               |                     | SIC                    | 0                                     | 426  | 133 | 441 |       |
|                         |                               | Front& center       | JMIC( $\alpha = 1/2$ ) | 0                                     | 928  | 69  | 3   |       |
|                         |                               |                     | JMIC( $\alpha = 1/3$ ) | 0                                     | 928  | 69  | 3   |       |
|                         |                               |                     | PMIC(C=1)              | 0                                     | 908  | 79  | 13  |       |
|                         |                               |                     | PMIC(C=10)             | 0                                     | 913  | 74  | 13  |       |
|                         |                               |                     | ZMIC                   | 0                                     | 913  | 77  | 10  |       |
|                         |                               |                     | SIC                    | 0                                     | 292  | 130 | 578 |       |
|                         |                               | Front&end           | JMIC( $\alpha = 1/2$ ) | 0                                     | 917  | 79  | 4   |       |
|                         |                               |                     | JMIC( $\alpha = 1/3$ ) | 0                                     | 917  | 79  | 4   |       |
|                         |                               |                     | PMIC(C=1)              | 0                                     | 904  | 83  | 13  |       |
|                         |                               |                     | PMIC(C=10)             | 0                                     | 906  | 81  | 13  |       |
|                         |                               |                     | ZMIC                   | 0                                     | 905  | 82  | 13  |       |
|                         |                               |                     | SIC                    | 0                                     | 220  | 157 | 623 |       |
|                         |                               | Center&end          | JMIC( $\alpha = 1/2$ ) | 0                                     | 873  | 117 | 10  |       |
|                         |                               |                     | JMIC( $\alpha = 1/3$ ) | 0                                     | 873  | 117 | 10  |       |
|                         |                               |                     | PMIC(C=1)              | 0                                     | 865  | 123 | 12  |       |
|                         |                               |                     | PMIC(C=10)             | 0                                     | 866  | 124 | 10  |       |
|                         |                               |                     | ZMIC                   | 0                                     | 868  | 122 | 10  |       |
|                         |                               |                     | SIC                    | 0                                     | 231  | 194 | 575 |       |

**Supplemental Table 12:** The frequencies of the number of change points  $\hat{K}$  estimated by the 1d fused LASSO with each criterion over 1000 simulations, when the true number of change points  $K = 5$  and  $n = 2000$ . Evenly spaced=(334,667,1000,1333,1666), Front& center=(67,280,787,1000,1213), Front&end=(133,346,1440,1653,1865), Center&end=(787,1000,1440,1653,1865).

| $(\mu_1, \dots, \mu_6)$ | $(\sigma_1, \dots, \sigma_6)$ | $(t_1, \dots, t_5)$ |                        | The estimated number of change points |      |     |     | Total |
|-------------------------|-------------------------------|---------------------|------------------------|---------------------------------------|------|-----|-----|-------|
|                         |                               |                     |                        | 4                                     | 5    | 6   | 7+  |       |
| (1,-1,0,-1,2,1)         | (0.1,...,0.1)                 | Evenly spaced       | JMIC( $\alpha = 1/2$ ) | 0                                     | 1000 | 0   | 0   | 1000  |
|                         |                               |                     | JMIC( $\alpha = 1/3$ ) | 0                                     | 1000 | 0   | 0   |       |
|                         |                               |                     | PMIC(C=1)              | 0                                     | 988  | 12  | 0   |       |
|                         |                               |                     | PMIC(C=10)             | 0                                     | 994  | 6   | 0   |       |
|                         |                               |                     | ZMIC                   | 0                                     | 991  | 9   | 0   |       |
|                         |                               |                     | SIC                    | 0                                     | 377  | 108 | 515 |       |
|                         |                               | Front& center       | JMIC( $\alpha = 1/2$ ) | 0                                     | 928  | 68  | 4   |       |
|                         |                               |                     | JMIC( $\alpha = 1/3$ ) | 0                                     | 927  | 69  | 4   |       |
|                         |                               |                     | PMIC(C=1)              | 0                                     | 914  | 71  | 15  |       |
|                         |                               |                     | PMIC(C=10)             | 0                                     | 914  | 71  | 15  |       |
|                         |                               |                     | ZMIC                   | 0                                     | 917  | 71  | 12  |       |
|                         |                               |                     | SIC                    | 0                                     | 236  | 113 | 651 |       |
|                         |                               | Front&end           | JMIC( $\alpha = 1/2$ ) | 0                                     | 910  | 87  | 3   |       |
|                         |                               |                     | JMIC( $\alpha = 1/3$ ) | 0                                     | 909  | 88  | 3   |       |
|                         |                               |                     | PMIC(C=1)              | 0                                     | 894  | 92  | 14  |       |
|                         |                               |                     | PMIC(C=10)             | 0                                     | 896  | 90  | 14  |       |
|                         |                               |                     | ZMIC                   | 0                                     | 895  | 92  | 13  |       |
|                         |                               |                     | SIC                    | 0                                     | 182  | 144 | 674 |       |
|                         |                               | Center&end          | JMIC( $\alpha = 1/2$ ) | 0                                     | 874  | 115 | 11  |       |
|                         |                               |                     | JMIC( $\alpha = 1/3$ ) | 0                                     | 874  | 115 | 11  |       |
|                         |                               |                     | PMIC(C=1)              | 0                                     | 867  | 122 | 11  |       |
|                         |                               |                     | PMIC(C=10)             | 0                                     | 869  | 120 | 11  |       |
|                         |                               |                     | ZMIC                   | 0                                     | 868  | 121 | 11  |       |
|                         |                               |                     | SIC                    | 0                                     | 195  | 158 | 647 |       |

**Supplemental Table 13:** The frequencies of the number of change points  $\hat{K}$  estimated by the 1d fused LASSO with each criterion over 1000 simulations, when the true number of change points  $K = 5$  and  $n = 3000$ . Evenly spaced=(500,1000,1500,2000,2500), Front& center=(100,420,1180,1500,1820), Front&end=(200,520,2160,2480,2800), Center&end=(1180,1500,2160,2480,2800).

| $(\mu_1, \dots, \mu_6)$ | $(\sigma_1, \dots, \sigma_6)$ | $(t_1, \dots, t_5)$ |                        | The estimated number of change points |     |     |     | Total |
|-------------------------|-------------------------------|---------------------|------------------------|---------------------------------------|-----|-----|-----|-------|
|                         |                               |                     |                        | 4                                     | 5   | 6   | 7+  |       |
| (1,-1,0,-1,2,1)         | (0.1, ..., 0.1)               | Evenly spaced       | JMIC( $\alpha = 1/2$ ) | 0                                     | 999 | 1   | 0   | 1000  |
|                         |                               |                     | JMIC( $\alpha = 1/3$ ) | 0                                     | 999 | 1   | 0   |       |
|                         |                               |                     | PMIC(C=1)              | 0                                     | 990 | 10  | 0   |       |
|                         |                               |                     | PMIC(C=10)             | 0                                     | 993 | 7   | 0   |       |
|                         |                               |                     | ZMIC                   | 0                                     | 991 | 9   | 0   |       |
|                         |                               |                     | SIC                    | 0                                     | 372 | 135 | 493 |       |
|                         |                               | Front& center       | JMIC( $\alpha = 1/2$ ) | 0                                     | 938 | 61  | 1   |       |
|                         |                               |                     | JMIC( $\alpha = 1/3$ ) | 0                                     | 936 | 62  | 2   |       |
|                         |                               |                     | PMIC(C=1)              | 0                                     | 921 | 66  | 13  |       |
|                         |                               |                     | PMIC(C=10)             | 0                                     | 924 | 64  | 12  |       |
|                         |                               |                     | ZMIC                   | 0                                     | 924 | 64  | 12  |       |
|                         |                               |                     | SIC                    | 0                                     | 245 | 128 | 627 |       |
|                         |                               | Front&end           | JMIC( $\alpha = 1/2$ ) | 0                                     | 904 | 90  | 6   |       |
|                         |                               |                     | JMIC( $\alpha = 1/3$ ) | 0                                     | 904 | 90  | 6   |       |
|                         |                               |                     | PMIC(C=1)              | 0                                     | 889 | 99  | 12  |       |
|                         |                               |                     | PMIC(C=10)             | 0                                     | 891 | 98  | 11  |       |
|                         |                               |                     | ZMIC                   | 0                                     | 891 | 98  | 11  |       |
|                         |                               |                     | SIC                    | 0                                     | 182 | 146 | 672 |       |
|                         |                               | Center&end          | JMIC( $\alpha = 1/2$ ) | 0                                     | 864 | 123 | 13  |       |
|                         |                               |                     | JMIC( $\alpha = 1/3$ ) | 0                                     | 864 | 123 | 13  |       |
|                         |                               |                     | PMIC(C=1)              | 0                                     | 859 | 128 | 13  |       |
|                         |                               |                     | PMIC(C=10)             | 0                                     | 862 | 125 | 13  |       |
|                         |                               |                     | ZMIC                   | 0                                     | 860 | 127 | 13  |       |
|                         |                               |                     | SIC                    | 0                                     | 191 | 153 | 656 |       |

**Supplemental Table 14:** The frequencies of the number of change points  $\hat{K}$  estimated by the 1d fused LASSO with each criterion over 1000 simulations, when the true number of change points  $K = 5$  and  $n = 4500$ . Evenly spaced=(750,1500,2250,3000,3750), Front& center=(150,630,1770,2250,2730), Front&end=(300,780,3240,3720,4200), Center&end=(1770,2250,3240,3720,4200).

| $(\mu_1, \dots, \mu_6)$ | $(\sigma_1, \dots, \sigma_6)$ | $(t_1, \dots, t_5)$ |                        | The estimated number of change points |      |     |     | Total |
|-------------------------|-------------------------------|---------------------|------------------------|---------------------------------------|------|-----|-----|-------|
|                         |                               |                     |                        | 4                                     | 5    | 6   | 7+  |       |
| (1,-1,0,-1,2,1)         | (0.1,...,0.1)                 | Evenly spaced       | JMIC( $\alpha = 1/2$ ) | 0                                     | 1000 | 0   | 0   | 1000  |
|                         |                               |                     | JMIC( $\alpha = 1/3$ ) | 0                                     | 1000 | 0   | 0   |       |
|                         |                               |                     | PMIC(C=1)              | 0                                     | 990  | 10  | 0   |       |
|                         |                               |                     | PMIC(C=10)             | 0                                     | 994  | 6   | 0   |       |
|                         |                               |                     | ZMIC                   | 0                                     | 993  | 7   | 0   |       |
|                         |                               |                     | SIC                    | 0                                     | 365  | 117 | 518 |       |
|                         |                               | Front& center       | JMIC( $\alpha = 1/2$ ) | 0                                     | 926  | 70  | 4   |       |
|                         |                               |                     | JMIC( $\alpha = 1/3$ ) | 0                                     | 926  | 70  | 4   |       |
|                         |                               |                     | PMIC(C=1)              | 0                                     | 911  | 75  | 14  |       |
|                         |                               |                     | PMIC(C=10)             | 0                                     | 913  | 74  | 13  |       |
|                         |                               |                     | ZMIC                   | 0                                     | 912  | 75  | 13  |       |
|                         |                               |                     | SIC                    | 0                                     | 252  | 116 | 632 |       |
|                         |                               | Front&end           | JMIC( $\alpha = 1/2$ ) | 0                                     | 909  | 87  | 4   |       |
|                         |                               |                     | JMIC( $\alpha = 1/3$ ) | 0                                     | 909  | 87  | 4   |       |
|                         |                               |                     | PMIC(C=1)              | 0                                     | 890  | 90  | 20  |       |
|                         |                               |                     | PMIC(C=10)             | 0                                     | 892  | 88  | 20  |       |
|                         |                               |                     | ZMIC                   | 0                                     | 893  | 89  | 18  |       |
|                         |                               |                     | SIC                    | 0                                     | 178  | 130 | 692 |       |
|                         |                               | Center&end          | JMIC( $\alpha = 1/2$ ) | 0                                     | 877  | 110 | 13  |       |
|                         |                               |                     | JMIC( $\alpha = 1/3$ ) | 0                                     | 877  | 110 | 13  |       |
|                         |                               |                     | PMIC(C=1)              | 0                                     | 874  | 112 | 14  |       |
|                         |                               |                     | PMIC(C=10)             | 0                                     | 874  | 112 | 14  |       |
|                         |                               |                     | ZMIC                   | 0                                     | 874  | 112 | 14  |       |
|                         |                               |                     | SIC                    | 0                                     | 209  | 157 | 634 |       |

**Supplemental Table 15:** The frequencies of the number of change points  $\hat{K}$  estimated by the 1d fused LASSO with each criterion over 1000 simulations, when the true number of change points  $K = 5$  and  $n = 6000$ . Evenly spaced=(1000,2000,3000,4000,5000), Front& center=(200,840,2360,3000,3640), Front&end=(400,1040,4320,4960,5600), Center&end=(2360,3000,4320,4960,5600).

| $(\mu_1, \dots, \mu_6)$ | $(\sigma_1, \dots, \sigma_6)$ | $(t_1, \dots, t_5)$ |                        | The estimated number of change points |      |     |     | Total |
|-------------------------|-------------------------------|---------------------|------------------------|---------------------------------------|------|-----|-----|-------|
|                         |                               |                     |                        | 4                                     | 5    | 6   | 7+  |       |
| (1,-1,0,-1,2,1)         | (0.1,...,0.1)                 | Evenly spaced       | JMIC( $\alpha = 1/2$ ) | 0                                     | 1000 | 0   | 0   | 1000  |
|                         |                               |                     | JMIC( $\alpha = 1/3$ ) | 0                                     | 1000 | 0   | 0   |       |
|                         |                               |                     | PMIC(C=1)              | 0                                     | 990  | 10  | 0   |       |
|                         |                               |                     | PMIC(C=10)             | 0                                     | 996  | 4   | 0   |       |
|                         |                               |                     | ZMIC                   | 0                                     | 990  | 10  | 0   |       |
|                         |                               |                     | SIC                    | 0                                     | 357  | 115 | 528 |       |
|                         |                               | Front& center       | JMIC( $\alpha = 1/2$ ) | 0                                     | 927  | 70  | 3   |       |
|                         |                               |                     | JMIC( $\alpha = 1/3$ ) | 0                                     | 927  | 70  | 3   |       |
|                         |                               |                     | PMIC(C=1)              | 0                                     | 917  | 71  | 12  |       |
|                         |                               |                     | PMIC(C=10)             | 0                                     | 918  | 72  | 10  |       |
|                         |                               |                     | ZMIC                   | 0                                     | 918  | 72  | 10  |       |
|                         |                               |                     | SIC                    | 0                                     | 259  | 131 | 610 |       |
|                         |                               | Front&end           | JMIC( $\alpha = 1/2$ ) | 0                                     | 920  | 78  | 2   |       |
|                         |                               |                     | JMIC( $\alpha = 1/3$ ) | 0                                     | 920  | 78  | 2   |       |
|                         |                               |                     | PMIC(C=1)              | 0                                     | 910  | 81  | 9   |       |
|                         |                               |                     | PMIC(C=10)             | 0                                     | 911  | 81  | 8   |       |
|                         |                               |                     | ZMIC                   | 0                                     | 910  | 81  | 9   |       |
|                         |                               |                     | SIC                    | 0                                     | 208  | 127 | 665 |       |
|                         |                               | Center&end          | JMIC( $\alpha = 1/2$ ) | 0                                     | 849  | 142 | 9   |       |
|                         |                               |                     | JMIC( $\alpha = 1/3$ ) | 0                                     | 849  | 142 | 9   |       |
|                         |                               |                     | PMIC(C=1)              | 0                                     | 847  | 144 | 9   |       |
|                         |                               |                     | PMIC(C=10)             | 0                                     | 849  | 142 | 9   |       |
|                         |                               |                     | ZMIC                   | 0                                     | 847  | 144 | 9   |       |
|                         |                               |                     | SIC                    | 0                                     | 211  | 140 | 649 |       |

**Supplemental Table 16:** The frequencies of the number of change points  $\hat{K}$  estimated by the 1d fused LASSO with each criterion over 1000 simulations, when the true number of change points  $K = 5$  and  $n = 7500$ . Evenly spaced=(1250,2500,3750,5000,6250), Front& center=(250,1050,2950,3750,4550), Front&end=(500,1300,5400,6200,7000), Center&end=(2950,3750,5400,6200,7000).



| $(\mu_1, \dots, \mu_9)$ | $(\sigma_1, \dots, \sigma_9)$ | $(t_1, \dots, t_8)$ |                        | The estimated number of change points |   |      |     |     | Total |
|-------------------------|-------------------------------|---------------------|------------------------|---------------------------------------|---|------|-----|-----|-------|
|                         |                               |                     |                        | 6                                     | 7 | 8    | 9   | 10+ |       |
| (1,-1,0,-1,2,1,2,0,1)   | (0.1,...,0.1)                 | Evenly spaced       | JMIC( $\alpha = 1/2$ ) | 0                                     | 0 | 1000 | 0   | 0   | 1000  |
|                         |                               |                     | JMIC( $\alpha = 1/3$ ) | 0                                     | 0 | 1000 | 0   | 0   |       |
|                         |                               |                     | PMIC(C=1)              | 0                                     | 0 | 964  | 31  | 5   |       |
|                         |                               |                     | PMIC(C=10)             | 0                                     | 0 | 969  | 26  | 5   |       |
|                         |                               |                     | ZMIC                   | 0                                     | 0 | 972  | 24  | 4   |       |
|                         |                               |                     | SIC                    | 0                                     | 0 | 551  | 153 | 296 |       |
|                         |                               | Front& center       | JMIC( $\alpha = 1/2$ ) | 2                                     | 0 | 761  | 211 | 26  |       |
|                         |                               |                     | JMIC( $\alpha = 1/3$ ) | 0                                     | 0 | 760  | 212 | 28  |       |
|                         |                               |                     | PMIC(C=1)              | 0                                     | 0 | 747  | 218 | 35  |       |
|                         |                               |                     | PMIC(C=10)             | 0                                     | 0 | 748  | 215 | 37  |       |
|                         |                               |                     | ZMIC                   | 0                                     | 0 | 749  | 216 | 35  |       |
|                         |                               |                     | SIC                    | 0                                     | 0 | 225  | 194 | 581 |       |
|                         |                               | Front&end           | JMIC( $\alpha = 1/2$ ) | 0                                     | 0 | 745  | 220 | 35  |       |
|                         |                               |                     | JMIC( $\alpha = 1/3$ ) | 0                                     | 0 | 744  | 221 | 35  |       |
|                         |                               |                     | PMIC(C=1)              | 0                                     | 0 | 718  | 236 | 46  |       |
|                         |                               |                     | PMIC(C=10)             | 0                                     | 0 | 716  | 238 | 46  |       |
|                         |                               |                     | ZMIC                   | 0                                     | 0 | 726  | 230 | 44  |       |
|                         |                               |                     | SIC                    | 0                                     | 0 | 195  | 222 | 583 |       |
|                         |                               | Center&end          | JMIC( $\alpha = 1/2$ ) | 1                                     | 0 | 713  | 234 | 52  |       |
|                         |                               |                     | JMIC( $\alpha = 1/3$ ) | 0                                     | 0 | 713  | 234 | 53  |       |
|                         |                               |                     | PMIC(C=1)              | 0                                     | 0 | 690  | 252 | 58  |       |
|                         |                               |                     | PMIC(C=10)             | 0                                     | 0 | 691  | 253 | 56  |       |
|                         |                               |                     | ZMIC                   | 0                                     | 0 | 692  | 254 | 54  |       |
|                         |                               |                     | SIC                    | 0                                     | 0 | 237  | 245 | 518 |       |

**Supplemental Table 17:** The frequencies of the number of change points  $\hat{K}$  estimated by the 1d fused LASSO with each criterion over 1000 simulations, when the true number of change points  $K = 8$  and  $n = 500$ . Evenly spaced=(60,115,170,225,280,335,390,445), Front& center=(18,53,88,210,245,280,315,350), Front&end=(30,65,100,325,360,395,430,465), Center&end=(180,215,250,325,360,395,430,465).

| $(\mu_1, \dots, \mu_9)$ | $(\sigma_1, \dots, \sigma_9)$ | $(t_1, \dots, t_8)$ |                        | The estimated number of change points |   |     |     |     | Total |
|-------------------------|-------------------------------|---------------------|------------------------|---------------------------------------|---|-----|-----|-----|-------|
|                         |                               |                     |                        | 6                                     | 7 | 8   | 9   | 10+ |       |
| (1,-1,0,-1,2,1,2,0,1)   | (0.1,...,0.1)                 | Evenly spaced       | JMIC( $\alpha = 1/2$ ) | 0                                     | 0 | 999 | 1   | 0   | 1000  |
|                         |                               |                     | JMIC( $\alpha = 1/3$ ) | 0                                     | 0 | 999 | 1   | 0   |       |
|                         |                               |                     | PMIC(C=1)              | 0                                     | 0 | 963 | 33  | 4   |       |
|                         |                               |                     | PMIC(C=10)             | 0                                     | 0 | 968 | 28  | 4   |       |
|                         |                               |                     | ZMIC                   | 0                                     | 0 | 970 | 27  | 3   |       |
|                         |                               |                     | SIC                    | 0                                     | 0 | 548 | 153 | 299 |       |
|                         |                               | Front& center       | JMIC( $\alpha = 1/2$ ) | 0                                     | 0 | 772 | 202 | 26  |       |
|                         |                               |                     | JMIC( $\alpha = 1/3$ ) | 0                                     | 0 | 771 | 203 | 26  |       |
|                         |                               |                     | PMIC(C=1)              | 0                                     | 0 | 754 | 205 | 41  |       |
|                         |                               |                     | PMIC(C=10)             | 0                                     | 0 | 755 | 205 | 40  |       |
|                         |                               |                     | ZMIC                   | 0                                     | 0 | 762 | 202 | 36  |       |
|                         |                               |                     | SIC                    | 0                                     | 0 | 236 | 202 | 562 |       |
|                         |                               | Front&end           | JMIC( $\alpha = 1/2$ ) | 0                                     | 0 | 753 | 209 | 38  |       |
|                         |                               |                     | JMIC( $\alpha = 1/3$ ) | 0                                     | 0 | 752 | 210 | 38  |       |
|                         |                               |                     | PMIC(C=1)              | 0                                     | 0 | 736 | 220 | 44  |       |
|                         |                               |                     | PMIC(C=10)             | 0                                     | 0 | 738 | 218 | 44  |       |
|                         |                               |                     | ZMIC                   | 0                                     | 0 | 741 | 215 | 44  |       |
|                         |                               |                     | SIC                    | 0                                     | 0 | 206 | 179 | 615 |       |
|                         |                               | Center&end          | JMIC( $\alpha = 1/2$ ) | 0                                     | 0 | 694 | 270 | 36  |       |
|                         |                               |                     | JMIC( $\alpha = 1/3$ ) | 0                                     | 0 | 694 | 270 | 36  |       |
|                         |                               |                     | PMIC(C=1)              | 0                                     | 0 | 686 | 274 | 40  |       |
|                         |                               |                     | PMIC(C=10)             | 0                                     | 0 | 687 | 274 | 39  |       |
|                         |                               |                     | ZMIC                   | 0                                     | 0 | 690 | 271 | 39  |       |
|                         |                               |                     | SIC                    | 0                                     | 0 | 233 | 256 | 511 |       |

**Supplemental Table 18:** The frequencies of the number of change points  $\hat{K}$  estimated by the 1d fused LASSO with each criterion over 1000 simulations, when the true number of change points  $K = 8$  and  $n = 1000$ . Evenly spaced=(111,222,333,444,555,666,777,888), Front& center=(35,106,177,420,491,562,633,704), Front&end=(60,131,202,646,717,788,859,930), Center&end=(358,429,500,646,717,788,859,930).

| $(\mu_1, \dots, \mu_9)$ | $(\sigma_1, \dots, \sigma_9)$ | $(t_1, \dots, t_8)$ |                        | The estimated number of change points |   |      |     |     | Total |
|-------------------------|-------------------------------|---------------------|------------------------|---------------------------------------|---|------|-----|-----|-------|
|                         |                               |                     |                        | 6                                     | 7 | 8    | 9   | 10+ |       |
| (1,-1,0,-1,2,1,2,0,1)   | (0.1,...,0.1)                 | Evenly spaced       | JMIC( $\alpha = 1/2$ ) | 0                                     | 0 | 1000 | 0   | 0   | 1000  |
|                         |                               |                     | JMIC( $\alpha = 1/3$ ) | 0                                     | 0 | 1000 | 0   | 0   |       |
|                         |                               |                     | PMIC(C=1)              | 0                                     | 0 | 971  | 26  | 3   |       |
|                         |                               |                     | PMIC(C=10)             | 0                                     | 0 | 977  | 23  | 0   |       |
|                         |                               |                     | ZMIC                   | 0                                     | 0 | 977  | 23  | 0   |       |
|                         |                               |                     | SIC                    | 0                                     | 0 | 532  | 165 | 303 |       |
|                         |                               | Front& center       | JMIC( $\alpha = 1/2$ ) | 0                                     | 0 | 768  | 194 | 38  |       |
|                         |                               |                     | JMIC( $\alpha = 1/3$ ) | 0                                     | 0 | 768  | 194 | 38  |       |
|                         |                               |                     | PMIC(C=1)              | 0                                     | 0 | 751  | 199 | 50  |       |
|                         |                               |                     | PMIC(C=10)             | 0                                     | 0 | 752  | 199 | 49  |       |
|                         |                               |                     | ZMIC                   | 0                                     | 0 | 753  | 200 | 47  |       |
|                         |                               |                     | SIC                    | 0                                     | 0 | 227  | 179 | 594 |       |
|                         |                               | Front&end           | JMIC( $\alpha = 1/2$ ) | 0                                     | 0 | 759  | 212 | 29  |       |
|                         |                               |                     | JMIC( $\alpha = 1/3$ ) | 0                                     | 0 | 759  | 212 | 29  |       |
|                         |                               |                     | PMIC(C=1)              | 0                                     | 0 | 748  | 215 | 37  |       |
|                         |                               |                     | PMIC(C=10)             | 0                                     | 0 | 750  | 214 | 36  |       |
|                         |                               |                     | ZMIC                   | 0                                     | 0 | 751  | 214 | 35  |       |
|                         |                               |                     | SIC                    | 0                                     | 0 | 221  | 183 | 596 |       |
|                         |                               | Center&end          | JMIC( $\alpha = 1/2$ ) | 0                                     | 0 | 696  | 256 | 48  |       |
|                         |                               |                     | JMIC( $\alpha = 1/3$ ) | 0                                     | 0 | 696  | 256 | 48  |       |
|                         |                               |                     | PMIC(C=1)              | 0                                     | 0 | 691  | 256 | 53  |       |
|                         |                               |                     | PMIC(C=10)             | 0                                     | 0 | 692  | 256 | 52  |       |
|                         |                               |                     | ZMIC                   | 0                                     | 0 | 693  | 255 | 52  |       |
|                         |                               |                     | SIC                    | 0                                     | 0 | 235  | 224 | 541 |       |

**Supplemental Table 19:** The frequencies of the number of change points  $\hat{K}$  estimated by the 1d fused LASSO with each criterion over 1000 simulations, when the true number of change points  $K = 8$  and  $n = 1500$ . Evenly spaced=(166,333,500,666,833,1000,1166,1333), Front& center=(53,159,265,630,736,842,948,1054), Front&end=(90,196,302,971,1077,1183,1289,1395), Center&end=(539,644,750,971,1077,1183,1289,1395).

| $(\mu_1, \dots, \mu_9)$ | $(\sigma_1, \dots, \sigma_9)$ | $(t_1, \dots, t_8)$ |                        | The estimated number of change points |   |      |     |     | Total |
|-------------------------|-------------------------------|---------------------|------------------------|---------------------------------------|---|------|-----|-----|-------|
|                         |                               |                     |                        | 6                                     | 7 | 8    | 9   | 10+ |       |
| (1,-1,0,-1,2,1,2,0,1)   | (0.1,...,0.1)                 | Evenly spaced       | JMIC( $\alpha = 1/2$ ) | 0                                     | 0 | 1000 | 0   | 0   | 1000  |
|                         |                               |                     | JMIC( $\alpha = 1/3$ ) | 0                                     | 0 | 1000 | 0   | 0   |       |
|                         |                               |                     | PMIC(C=1)              | 0                                     | 0 | 979  | 21  | 0   |       |
|                         |                               |                     | PMIC(C=10)             | 0                                     | 0 | 982  | 18  | 0   |       |
|                         |                               |                     | ZMIC                   | 0                                     | 0 | 981  | 19  | 0   |       |
|                         |                               |                     | SIC                    | 0                                     | 0 | 559  | 159 | 282 |       |
|                         |                               | Front& center       | JMIC( $\alpha = 1/2$ ) | 0                                     | 0 | 768  | 202 | 30  |       |
|                         |                               |                     | JMIC( $\alpha = 1/3$ ) | 0                                     | 0 | 766  | 204 | 30  |       |
|                         |                               |                     | PMIC(C=1)              | 0                                     | 0 | 749  | 210 | 41  |       |
|                         |                               |                     | PMIC(C=10)             | 0                                     | 0 | 752  | 209 | 39  |       |
|                         |                               |                     | ZMIC                   | 0                                     | 0 | 752  | 211 | 37  |       |
|                         |                               |                     | SIC                    | 0                                     | 0 | 226  | 178 | 596 |       |
|                         |                               | Front&end           | JMIC( $\alpha = 1/2$ ) | 0                                     | 0 | 789  | 183 | 28  |       |
|                         |                               |                     | JMIC( $\alpha = 1/3$ ) | 0                                     | 0 | 789  | 183 | 28  |       |
|                         |                               |                     | PMIC(C=1)              | 0                                     | 0 | 778  | 185 | 37  |       |
|                         |                               |                     | PMIC(C=10)             | 0                                     | 0 | 782  | 182 | 36  |       |
|                         |                               |                     | ZMIC                   | 0                                     | 0 | 781  | 183 | 36  |       |
|                         |                               |                     | SIC                    | 0                                     | 0 | 231  | 187 | 582 |       |
|                         |                               | Center&end          | JMIC( $\alpha = 1/2$ ) | 0                                     | 0 | 710  | 244 | 46  |       |
|                         |                               |                     | JMIC( $\alpha = 1/3$ ) | 0                                     | 0 | 710  | 244 | 46  |       |
|                         |                               |                     | PMIC(C=1)              | 0                                     | 0 | 703  | 246 | 51  |       |
|                         |                               |                     | PMIC(C=10)             | 0                                     | 0 | 704  | 247 | 49  |       |
|                         |                               |                     | ZMIC                   | 0                                     | 0 | 705  | 246 | 49  |       |
|                         |                               |                     | SIC                    | 0                                     | 0 | 233  | 265 | 502 |       |

**Supplemental Table 20:** The frequencies of the number of change points  $\hat{K}$  estimated by the 1d fused LASSO with each criterion over 1000 simulations, when the true number of change points  $K = 8$  and  $n = 2000$ . Evenly spaced=(222,444,666,888,1110,1332,1554,1776), Front& center=(70,212,354,840,982,1124,1266,1408), Front&end=(120,262,404,1292,1434,1576,1718,1860), Center&end=(716,858,1000,1292,1434,1576,1718,1860).

| $(\mu_1, \dots, \mu_9)$ | $(\sigma_1, \dots, \sigma_9)$ | $(t_1, \dots, t_8)$ |                        | The estimated number of change points |   |     |     |     | Total |
|-------------------------|-------------------------------|---------------------|------------------------|---------------------------------------|---|-----|-----|-----|-------|
|                         |                               |                     |                        | 6                                     | 7 | 8   | 9   | 10+ |       |
| (1,-1,0,-1,2,1,2,0,1)   | (0.1,...,0.1)                 | Evenly spaced       | JMIC( $\alpha = 1/2$ ) | 0                                     | 0 | 999 | 1   | 0   | 1000  |
|                         |                               |                     | PMIC(C=1)              | 0                                     | 0 | 978 | 21  | 1   |       |
|                         |                               |                     | PMIC(C=10)             | 0                                     | 0 | 983 | 17  | 0   |       |
|                         |                               |                     | ZMIC                   | 0                                     | 0 | 984 | 16  | 0   |       |
|                         |                               |                     | SIC                    | 0                                     | 0 | 547 | 154 | 299 |       |
|                         |                               | Front& center       | JMIC( $\alpha = 1/2$ ) | 0                                     | 0 | 747 | 218 | 35  |       |
|                         |                               |                     | JMIC( $\alpha = 1/3$ ) | 0                                     | 0 | 747 | 218 | 35  |       |
|                         |                               |                     | PMIC(C=1)              | 0                                     | 0 | 735 | 221 | 44  |       |
|                         |                               |                     | PMIC(C=10)             | 0                                     | 0 | 737 | 220 | 43  |       |
|                         |                               |                     | ZMIC                   | 0                                     | 0 | 738 | 219 | 43  |       |
|                         |                               | Front&end           | SIC                    | 0                                     | 0 | 235 | 202 | 563 |       |
|                         |                               |                     | JMIC( $\alpha = 1/2$ ) | 0                                     | 0 | 799 | 178 | 23  |       |
|                         |                               |                     | JMIC( $\alpha = 1/3$ ) | 0                                     | 0 | 799 | 178 | 23  |       |
|                         |                               |                     | PMIC(C=1)              | 0                                     | 0 | 789 | 183 | 28  |       |
|                         |                               |                     | PMIC(C=10)             | 0                                     | 0 | 789 | 182 | 29  |       |
|                         |                               | Center&end          | ZMIC                   | 0                                     | 0 | 789 | 183 | 28  |       |
|                         |                               |                     | SIC                    | 0                                     | 0 | 228 | 195 | 577 |       |
|                         |                               |                     | JMIC( $\alpha = 1/2$ ) | 0                                     | 0 | 706 | 239 | 55  |       |
|                         |                               |                     | JMIC( $\alpha = 1/3$ ) | 0                                     | 0 | 706 | 239 | 55  |       |
|                         |                               |                     | PMIC(C=1)              | 0                                     | 0 | 699 | 243 | 58  |       |
|                         |                               |                     | PMIC(C=10)             | 0                                     | 0 | 700 | 243 | 57  |       |
|                         |                               |                     | ZMIC                   | 0                                     | 0 | 699 | 244 | 57  |       |
|                         |                               |                     | SIC                    | 0                                     | 0 | 235 | 233 | 532 |       |

**Supplemental Table 21:** The frequencies of the number of change points  $\hat{K}$  estimated by the 1d fused LASSO with each criterion over 1000 simulations, when the true number of change points  $K = 8$  and  $n = 3000$ . Evenly spaced=(334,667,1000,1333,1666,2000,2333,2666), Front& center=(105,318,531,1260,1473,1686,1899,2112), Front&end=(180,393,606,1938,2151,2364,2577,2790), Center&end=(1074,1287,1500,1938,2151,2364,2577,2790).

| $(\mu_1, \dots, \mu_9)$ | $(\sigma_1, \dots, \sigma_9)$ | $(t_1, \dots, t_8)$ |                        | The estimated number of change points |   |     |     |     | Total |
|-------------------------|-------------------------------|---------------------|------------------------|---------------------------------------|---|-----|-----|-----|-------|
|                         |                               |                     |                        | 6                                     | 7 | 8   | 9   | 10+ |       |
| (1,-1,0,-1,2,1,2,0,1)   | (0.1,...,0.1)                 | Evenly spaced       | JMIC( $\alpha = 1/2$ ) | 0                                     | 0 | 999 | 1   | 0   | 1000  |
|                         |                               |                     | JMIC( $\alpha = 1/3$ ) | 0                                     | 0 | 999 | 1   | 0   |       |
|                         |                               |                     | PMIC(C=1)              | 0                                     | 0 | 990 | 8   | 2   |       |
|                         |                               |                     | PMIC(C=10)             | 0                                     | 0 | 993 | 5   | 2   |       |
|                         |                               |                     | ZMIC                   | 0                                     | 0 | 995 | 4   | 1   |       |
|                         |                               |                     | SIC                    | 0                                     | 0 | 564 | 156 | 280 |       |
|                         |                               | Front& center       | JMIC( $\alpha = 1/2$ ) | 0                                     | 0 | 794 | 174 | 32  |       |
|                         |                               |                     | JMIC( $\alpha = 1/3$ ) | 0                                     | 0 | 794 | 174 | 32  |       |
|                         |                               |                     | PMIC(C=1)              | 0                                     | 0 | 783 | 175 | 42  |       |
|                         |                               |                     | PMIC(C=10)             | 0                                     | 0 | 785 | 173 | 42  |       |
|                         |                               |                     | ZMIC                   | 0                                     | 0 | 785 | 173 | 42  |       |
|                         |                               |                     | SIC                    | 0                                     | 0 | 224 | 202 | 574 |       |
|                         |                               | Front&end           | JMIC( $\alpha = 1/2$ ) | 0                                     | 0 | 786 | 188 | 26  |       |
|                         |                               |                     | JMIC( $\alpha = 1/3$ ) | 0                                     | 0 | 786 | 188 | 26  |       |
|                         |                               |                     | PMIC(C=1)              | 0                                     | 0 | 777 | 192 | 31  |       |
|                         |                               |                     | PMIC(C=10)             | 0                                     | 0 | 777 | 194 | 29  |       |
|                         |                               |                     | ZMIC                   | 0                                     | 0 | 777 | 194 | 29  |       |
|                         |                               |                     | SIC                    | 0                                     | 0 | 215 | 203 | 582 |       |
|                         |                               | Center&end          | JMIC( $\alpha = 1/2$ ) | 0                                     | 0 | 718 | 239 | 43  |       |
|                         |                               |                     | JMIC( $\alpha = 1/3$ ) | 0                                     | 0 | 718 | 239 | 43  |       |
|                         |                               |                     | PMIC(C=1)              | 0                                     | 0 | 712 | 245 | 43  |       |
|                         |                               |                     | PMIC(C=10)             | 0                                     | 0 | 712 | 245 | 43  |       |
|                         |                               |                     | ZMIC                   | 0                                     | 0 | 714 | 243 | 43  |       |
|                         |                               |                     | SIC                    | 0                                     | 0 | 229 | 223 | 548 |       |

**Supplemental Table 22:** The frequencies of the number of change points  $\hat{K}$  estimated by the 1d fused LASSO with each criterion over 1000 simulations, when the true number of change points  $K = 8$  and  $n = 4500$ . Evenly spaced=(500,1000,1500,2000,2500,3000,3500,4000), Front& center=(158,478,798,1890,2210,2530,2850,3170), Front&end=(270,590,910,2905,3225,3545,3865,4185), Center&end=(1610,1930,2250,2905,3225,3545,3865,4185).

|                         |                               |                     | The estimated number of change points |   |   |      |     |     |       |
|-------------------------|-------------------------------|---------------------|---------------------------------------|---|---|------|-----|-----|-------|
| $(\mu_1, \dots, \mu_9)$ | $(\sigma_1, \dots, \sigma_9)$ | $(t_1, \dots, t_8)$ |                                       | 6 | 7 | 8    | 9   | 10+ | Total |
| (1,-1,0,-1,2,1,2,0,1)   | (0.1,...,0.1)                 | Evenly spaced       | JMIC( $\alpha = 1/2$ )                | 0 | 0 | 1000 | 0   | 0   | 1000  |
|                         |                               |                     | JMIC( $\alpha = 1/3$ )                | 0 | 0 | 1000 | 0   | 0   |       |
|                         |                               |                     | PMIC(C=1)                             | 0 | 0 | 987  | 13  | 0   |       |
|                         |                               |                     | PMIC(C=10)                            | 0 | 0 | 990  | 10  | 0   |       |
|                         |                               |                     | ZMIC                                  | 0 | 0 | 990  | 10  | 0   |       |
|                         |                               |                     | SIC                                   | 0 | 0 | 525  | 171 | 304 |       |
|                         |                               | Front& center       | JMIC( $\alpha = 1/2$ )                | 0 | 0 | 776  | 200 | 24  |       |
|                         |                               |                     | JMIC( $\alpha = 1/3$ )                | 0 | 0 | 775  | 201 | 24  |       |
|                         |                               |                     | PMIC(C=1)                             | 0 | 0 | 770  | 203 | 27  |       |
|                         |                               |                     | PMIC(C=10)                            | 0 | 0 | 770  | 203 | 27  |       |
|                         |                               |                     | ZMIC                                  | 0 | 0 | 770  | 203 | 27  |       |
|                         |                               |                     | SIC                                   | 0 | 0 | 247  | 188 | 565 |       |
|                         |                               | Front&end           | JMIC( $\alpha = 1/2$ )                | 0 | 0 | 776  | 198 | 26  |       |
|                         |                               |                     | JMIC( $\alpha = 1/3$ )                | 0 | 0 | 776  | 198 | 26  |       |
|                         |                               |                     | PMIC(C=1)                             | 0 | 0 | 769  | 201 | 30  |       |
|                         |                               |                     | PMIC(C=10)                            | 0 | 0 | 769  | 201 | 30  |       |
|                         |                               |                     | ZMIC                                  | 0 | 0 | 770  | 201 | 29  |       |
|                         |                               |                     | SIC                                   | 0 | 0 | 208  | 208 | 584 |       |
|                         |                               | Center&end          | JMIC( $\alpha = 1/2$ )                | 0 | 0 | 677  | 273 | 50  |       |
|                         |                               |                     | JMIC( $\alpha = 1/3$ )                | 0 | 0 | 677  | 273 | 50  |       |
|                         |                               |                     | PMIC(C=1)                             | 0 | 0 | 671  | 276 | 53  |       |
|                         |                               |                     | PMIC(C=10)                            | 0 | 0 | 674  | 274 | 52  |       |
|                         |                               |                     | ZMIC                                  | 0 | 0 | 675  | 273 | 52  |       |
|                         |                               |                     | SIC                                   | 0 | 0 | 196  | 266 | 538 |       |

**Supplemental Table 23:** The frequencies of the number of change points  $\hat{K}$  estimated by the 1d fused LASSO with each criterion over 1000 simulations, when the true number of change points  $K = 8$  and  $n = 6000$ . Evenly spaced=(667,1333,2000,2666,3332,4000,4666,5332), Front& center=(210,637,1064,2520,2947,3374,3801,4228), Front&end=(360,787,1214,3872,4299,4726,5153,5580), Center&end=(2146,2573,3000,3872,4299,4726,5153,5580).

| $(\mu_1, \dots, \mu_9)$ | $(\sigma_1, \dots, \sigma_9)$ | $(t_1, \dots, t_8)$ |                        | The estimated number of change points |   |      |     |     | Total |
|-------------------------|-------------------------------|---------------------|------------------------|---------------------------------------|---|------|-----|-----|-------|
|                         |                               |                     |                        | 6                                     | 7 | 8    | 9   | 10+ |       |
| (1,-1,0,-1,2,1,2,0,1)   | (0.1,...,0.1)                 | Evenly spaced       | JMIC( $\alpha = 1/2$ ) | 0                                     | 0 | 1000 | 0   | 0   | 1000  |
|                         |                               |                     | JMIC( $\alpha = 1/3$ ) | 0                                     | 0 | 1000 | 0   | 0   |       |
|                         |                               |                     | PMIC(C=1)              | 0                                     | 0 | 989  | 11  | 0   |       |
|                         |                               |                     | PMIC(C=10)             | 0                                     | 0 | 989  | 11  | 0   |       |
|                         |                               |                     | ZMIC                   | 0                                     | 0 | 989  | 11  | 0   |       |
|                         |                               |                     | SIC                    | 0                                     | 0 | 519  | 171 | 310 |       |
|                         |                               | Front& center       | JMIC( $\alpha = 1/2$ ) | 0                                     | 0 | 771  | 193 | 36  |       |
|                         |                               |                     | JMIC( $\alpha = 1/3$ ) | 0                                     | 0 | 771  | 193 | 36  |       |
|                         |                               |                     | PMIC(C=1)              | 0                                     | 0 | 764  | 194 | 42  |       |
|                         |                               |                     | PMIC(C=10)             | 0                                     | 0 | 764  | 194 | 42  |       |
|                         |                               |                     | ZMIC                   | 0                                     | 0 | 766  | 194 | 40  |       |
|                         |                               |                     | SIC                    | 0                                     | 0 | 240  | 170 | 590 |       |
|                         |                               | Front&end           | JMIC( $\alpha = 1/2$ ) | 0                                     | 0 | 777  | 197 | 26  |       |
|                         |                               |                     | JMIC( $\alpha = 1/3$ ) | 0                                     | 0 | 776  | 198 | 26  |       |
|                         |                               |                     | PMIC(C=1)              | 0                                     | 0 | 774  | 196 | 30  |       |
|                         |                               |                     | PMIC(C=10)             | 0                                     | 0 | 774  | 196 | 30  |       |
|                         |                               |                     | ZMIC                   | 0                                     | 0 | 774  | 197 | 29  |       |
|                         |                               |                     | SIC                    | 0                                     | 0 | 245  | 231 | 524 |       |
|                         |                               | Center&end          | JMIC( $\alpha = 1/2$ ) | 0                                     | 0 | 709  | 239 | 52  |       |
|                         |                               |                     | JMIC( $\alpha = 1/3$ ) | 0                                     | 0 | 709  | 239 | 52  |       |
|                         |                               |                     | PMIC(C=1)              | 0                                     | 0 | 704  | 244 | 52  |       |
|                         |                               |                     | PMIC(C=10)             | 0                                     | 0 | 704  | 244 | 52  |       |
|                         |                               |                     | ZMIC                   | 0                                     | 0 | 704  | 244 | 52  |       |
|                         |                               |                     | SIC                    | 0                                     | 0 | 243  | 245 | 512 |       |

**Supplemental Table 24:** The frequencies of the number of change points  $\hat{K}$  estimated by the 1d fused LASSO with each criterion over 1000 simulations, when the true number of change points  $K = 8$  and  $n = 7500$ . Evenly spaced=(834,1667,2500,3333,4166,5000,5833,6666), Front& center=(263,795,1328,3150,3683,4216,4749,5282), Front&end=(450,983,1516,4843,5376,5909,6442,6975), Center&end=(2684,3217,3750,4843,5376,5909,6442,6975).
